# Supplementary material
Source: publisher figshare collection journal article supplement (https://acs.figshare.com/ndownloader/files/4668511)
Supplement: Supplementary file 1 [file 4668511]

data_[Na(THF)6][tpaPhFe]*THF

_audit_creation_date                  'Fri Sep  7 16:08:31 2007'
_audit_creation_method                'by teXsan'
_audit_update_record                   ?

#------------------------------------------------------------------------------

# PROCESSING SUMMARY (IUCr Office Use Only) 
_journal_date_recd_electronic          ?
_journal_date_from_coeditor            ?
_journal_date_accepted                 ?
_journal_coeditor_code                 ?

#------------------------------------------------------------------------------

# SUBMISSION DETAILS 
_publ_contact_author_name             ' Christopher J. Chang'
_publ_contact_author_address
;
    ENTER ADDRESS
;
_publ_contact_author_email            ' chrischang@berkeley.edu'
_publ_contact_author_fax              ' ENTER FAX NUMBER '
_publ_contact_author_phone            ' ENTER PHONE NUMBER '
_publ_contact_letter
;
    ENTER TEXT OF LETTER
;
_publ_requested_journal               ' J. Am. Chem. Soc.'
_publ_requested_category              ' SC'

_publ_requested_coeditor_name          ?

#------------------------------------------------------------------------------

# TITLE AND AUTHOR LIST 

_publ_section_title
;
N~2~O Activation and Oxidation Reactivity from a Non-Heme Iron Pyrrole Platform
;

_publ_section_title_footnote
;
    ENTER FOOTNOTE TO TITLE OF PAPER
;
loop_
_publ_author_name
_publ_author_address
' W. Hill Harman '
;
  Department of Chemistry, University of California, Berkeley, CA  94720
;

#------------------------------------------------------------------------------

# TEXT 

_publ_section_abstract
;
    ENTER ABSTRACT
;

_publ_section_comment
;
    ENTER TEXT
;

_publ_section_acknowledgements
;
    ENTER ACKNOWLEDGEMENTS
;

_publ_section_references
;
    ENTER OTHER REFERENCES
Molecular Structure Corporation, Rigaku Corporation. (1998). teXsan. 
Single Crystal Structure Analysis Software. Version 1.10.
MSC, 3200 Research Forest Drive, The Woodlands, TX 77381, USA.
Rigaku, 3-9-12 Akishima, Tokyo, Japan.
Blessing, R. H., (1995), Acta Crystallogr, A51, 33-38.
;

_publ_section_figure_captions
;
    ENTER FIGURE CAPTIONS
;

_publ_section_exptl_prep
;
    ENTER COMPOUND PREPARATION DETAILS
;

_publ_section_exptl_refinement
;
    The asymmetric unit contains a disordered molecule of THF on a crystallographic threefold axis which was modeled as two different conformations sharing an oxygen atom.  The atoms in this fragment were refined isotropically and hydrogen atoms were not included.
;

#------------------------------------------------------------------------------

# CHEMICAL DATA 
_chemical_formula_sum                  'C61 H83 Fe N4 Na O7 '
_chemical_formula_moiety               'C24 H48 Na O6, C33 H27 Fe N4, C4 H8 O'
_chemical_formula_weight               1063.17
_chemical_melting_point                ?

#------------------------------------------------------------------------------

# CRYSTAL DATA 
_symmetry_cell_setting                 trigonal
_symmetry_space_group_name_H-M        'R 3 c      '
_symmetry_Int_Tables_number            161
_symmetry_space_group_name_Hall       'R 3 -2"c'

#------------------------------------------------------------------------------

loop_
_symmetry_equiv_pos_as_xyz
x,y,z
-y,x-y,z
-x+y,-x,z
-y,-x,1/2+z
x,x-y,1/2+z
-x+y,y,1/2+z
2/3+x,1/3+y,1/3+z
2/3-y,1/3+x-y,1/3+z
2/3-x+y,1/3-x,1/3+z
2/3-y,1/3-x,5/6+z
2/3+x,1/3+x-y,5/6+z
2/3-x+y,1/3+y,5/6+z
1/3+x,2/3+y,2/3+z
1/3-y,2/3+x-y,2/3+z
1/3-x+y,2/3-x,2/3+z
1/3-y,2/3-x,1/6+z
1/3+x,2/3+x-y,1/6+z
1/3-x+y,2/3+y,1/6+z
_cell_length_a                         13.596(1)
_cell_length_b                         13.596(1)
_cell_length_c                         55.303(5)
_cell_angle_alpha                      90
_cell_angle_beta                       90
_cell_angle_gamma                      120
_cell_volume                           8853(1)
_cell_formula_units_Z                  6
_cell_measurement_reflns_used          5247
_cell_measurement_theta_min            2.2
_cell_measurement_theta_max            23.9
_cell_measurement_temperature          168.2

#------------------------------------------------------------------------------

_exptl_crystal_description            'prism'
_exptl_crystal_colour                 'yellow'
_exptl_crystal_size_max                0.400
_exptl_crystal_size_mid                0.220
_exptl_crystal_size_min                0.200
_exptl_crystal_size_rad                ?
_exptl_crystal_density_diffrn          1.196
_exptl_crystal_density_meas            ?
_exptl_crystal_density_method         'not measured'
_exptl_crystal_F_000                   3420.00
_exptl_absorpt_coefficient_mu          0.316
_exptl_absorpt_correction_type         empirical
_exptl_absorpt_process_details         'Blessing, 1995'
_exptl_absorpt_correction_T_min        0.860
_exptl_absorpt_correction_T_max        1.000

#------------------------------------------------------------------------------

# EXPERIMENTAL DATA 
_diffrn_radiation_type                'Mo K\a'
_diffrn_radiation_wavelength           0.7107
_diffrn_measurement_device_type        'Bruker APEX'
_diffrn_measurement_method             \w-scans
_diffrn_standards_number               0
_diffrn_standards_interval_count       0
_diffrn_standards_interval_time        0
_diffrn_standards_decay_%              0
_diffrn_reflns_number                  17024
_diffrn_reflns_av_R_equivalents        0.020
_diffrn_reflns_theta_max               26.41
_diffrn_measured_fraction_theta_max    1.9272
_diffrn_reflns_theta_full              26.41
_diffrn_measured_fraction_theta_full   1.9272
_diffrn_reflns_limit_h_min             0
_diffrn_reflns_limit_h_max             17
_diffrn_reflns_limit_k_min             -14
_diffrn_reflns_limit_k_max             14
_diffrn_reflns_limit_l_min             -69
_diffrn_reflns_limit_l_max             60

#------------------------------------------------------------------------------

# REFINEMENT DATA 
_refine_special_details
;
Refinement using reflections with F^2^ > 3.0 sigma(F^2^). The weighted R-factor
(wR), goodness of fit (S) and R-factor (gt) are based on F, with F set to zero 
for negative F. The threshold expression of F^2^ > 3.0 sigma(F^2^) is used only 
for calculating R-factor (gt).
;
_reflns_number_total                   3918
_reflns_number_gt                      3055
_reflns_threshold_expression           F^2^>3.0\s(F^2^)
_refine_ls_structure_factor_coef       F
_refine_ls_R_factor_gt                 0.0416
_refine_ls_wR_factor_ref               0.0515
_refine_ls_R_factor_all                0.0538
_refine_ls_wR_factor_all               0.0536
_refine_ls_hydrogen_treatment          constr
_refine_ls_number_reflns               3055
_refine_ls_number_parameters           227
_refine_ls_goodness_of_fit_ref         2.009
_refine_ls_weighting_scheme            calc
_refine_ls_weighting_details
   'w = 1/[\s^2^(Fo) + 0.00022|Fo|^2^]'
_refine_ls_shift/su_max                0.0147
_refine_diff_density_max               0.42
_refine_diff_density_min               -0.16
_refine_ls_extinction_method           none
_refine_ls_extinction_coef             ?
_refine_ls_abs_structure_details       Flack
_refine_ls_abs_structure_Flack         0.02(2)
loop_
_atom_type_symbol
_atom_type_description
_atom_type_scat_dispersion_real
_atom_type_scat_dispersion_imag
_atom_type_scat_source
  'Fe' 'Fe'  0.346 0.844 
;International Tables for Crystallography
(1992, Vol. C, Tables 4.2.6.8 and 6.1.1.1)
;
  'Na' 'Na'  0.036 0.025 
;International Tables for Crystallography
(1992, Vol. C, Tables 4.2.6.8 and 6.1.1.1)
;
  'C' 'C'  0.003 0.002 
;International Tables for Crystallography
(1992, Vol. C, Tables 4.2.6.8 and 6.1.1.1)
;
  'N' 'N'  0.006 0.003 
;International Tables for Crystallography
(1992, Vol. C, Tables 4.2.6.8 and 6.1.1.1)
;
  'O' 'O'  0.011 0.006 
;International Tables for Crystallography
(1992, Vol. C, Tables 4.2.6.8 and 6.1.1.1)
;
  'H' 'H'  0.000 0.000 
;International Tables for Crystallography
(1992, Vol. C, Table 6.1.1.2)
;

#------------------------------------------------------------------------------

_computing_data_collection            'Bruker-AXS SMART v5.631'
_computing_cell_refinement            'Bruker-AXS SAINT v6.40'
_computing_data_reduction             'Bruker-AXS SAINT v6.40'
_computing_structure_solution          SIR97
_computing_structure_refinement       'teXsan'
_computing_publication_material       'teXsan'
_computing_molecular_graphics          ?

#------------------------------------------------------------------------------

# ATOMIC COORDINATES AND DISPLACEMENT PARAMETERS 
loop_
_atom_site_label
_atom_site_type_symbol
_atom_site_fract_x
_atom_site_fract_y
_atom_site_fract_z
_atom_site_U_iso_or_equiv
_atom_site_adp_type
_atom_site_occupancy
_atom_site_calc_flag
_atom_site_refinement_flags
_atom_site_disorder_assembly
_atom_site_disorder_group
 Fe1    Fe 1.0000      0.0000      0.2655      0.04689(8)  Uani 1.00 d SP . .
 Na1    Na 0.6667      -0.6667     0.31901(3)  0.0482(2)   Uani 1.00 d SP . .
 O1     O  0.8060(2)   -0.5212(2)  0.29363(4)  0.0614(6)   Uani 1.00 d . . .
 O2     O  0.8116(2)   -0.6615(2)  0.34451(4)  0.0636(7)   Uani 1.00 d . . .
 O3     O  0.9772(9)   0.008(1)    0.14258(10) 0.064(2)    Uiso 0.33 d P . .
 N1     N  1.0000      0.0000      0.30490(6)  0.0573(6)   Uani 1.00 d SP . .
 N2     N  0.8357(2)   -0.1165(2)  0.27010(4)  0.0505(6)   Uani 1.00 d . . .
 C1     C  0.8811(3)   -0.0412(3)  0.31177(5)  0.0660(10)  Uani 1.00 d . . .
 C2     C  0.8019(3)   -0.1308(3)  0.29418(5)  0.0584(9)   Uani 1.00 d . . .
 C3     C  0.7002(3)   -0.2258(3)  0.29710(6)  0.067(1)    Uani 1.00 d . . .
 C4     C  0.6658(3)   -0.2761(3)  0.27391(7)  0.0633(9)   Uani 1.00 d . . .
 C5     C  0.7495(3)   -0.2087(3)  0.25793(5)  0.0525(8)   Uani 1.00 d . . .
 C6     C  0.7590(2)   -0.2261(3)  0.23243(5)  0.0536(8)   Uani 1.00 d . . .
 C7     C  0.7052(3)   -0.3359(3)  0.22272(6)  0.072(1)    Uani 1.00 d . . .
 C8     C  0.7159(4)   -0.3549(4)  0.19851(8)  0.086(1)    Uani 1.00 d . . .
 C9     C  0.7792(4)   -0.2672(5)  0.18358(6)  0.090(1)    Uani 1.00 d . . .
 C10    C  0.8343(3)   -0.1559(4)  0.19223(6)  0.088(1)    Uani 1.00 d . . .
 C11    C  0.8226(3)   -0.1356(3)  0.21662(5)  0.0679(10)  Uani 1.00 d . . .
 C12    C  0.7813(3)   -0.4740(4)  0.27277(7)  0.089(1)    Uani 1.00 d . . .
 C13    C  0.8870(4)   -0.3712(4)  0.26615(10) 0.112(2)    Uani 1.00 d . . .
 C14    C  0.9800(4)   -0.3852(4)  0.27649(8)  0.094(1)    Uani 1.00 d . . .
 C15    C  0.9249(3)   -0.4611(3)  0.29797(7)  0.076(1)    Uani 1.00 d . . .
 C16    C  0.8554(4)   -0.5980(4)  0.36632(7)  0.088(1)    Uani 1.00 d . . .
 C17    C  0.8978(4)   -0.6611(4)  0.38049(8)  0.094(1)    Uani 1.00 d . . .
 C18    C  0.9372(5)   -0.7092(5)  0.36177(9)  0.123(2)    Uani 1.00 d . . .
 C19    C  0.8515(4)   -0.7400(5)  0.34178(8)  0.094(2)    Uani 1.00 d . . .
 C20    C  1.0280(7)   0.1043(7)   0.1281(2)   0.071(2)    Uiso 0.42 d P . .
 C21    C  1.020(1)    0.0728(9)   0.1018(2)   0.070(2)    Uiso 0.42 d P . .
 C22    C  0.917(1)    -0.001(2)   0.1297(3)   0.084(4)    Uiso 0.25 d P . .
 C23    C  0.959(2)    0.016(2)    0.1018(3)   0.066(4)    Uiso 0.25 d P . .
 H1     H  0.6602      -0.2558     0.3123      0.0812      Uiso 1.00 calc . . .
 H2     H  0.5960      -0.3440     0.2700      0.0793      Uiso 1.00 calc . . .
 H3     H  0.6583      -0.4011     0.2331      0.0898      Uiso 1.00 calc . . .
 H4     H  0.6772      -0.4343     0.1926      0.1040      Uiso 1.00 calc . . .
 H5     H  0.7841      -0.2791     0.1669      0.1181      Uiso 1.00 calc . . .
 H6     H  0.8818      -0.0907     0.1816      0.1054      Uiso 1.00 calc . . .
 H7     H  0.8607      -0.0581     0.2225      0.0816      Uiso 1.00 calc . . .
 H8     H  0.8686      -0.0681     0.3277      0.0821      Uiso 1.00 calc . . .
 H9     H  0.8679      0.0231      0.3110      0.0821      Uiso 1.00 calc . . .
 H10    H  0.7523      -0.5232     0.2600      0.1143      Uiso 1.00 calc . . .
 H11    H  0.7267      -0.4489     0.2773      0.1143      Uiso 1.00 calc . . .
 H12    H  0.8918      -0.3651     0.2487      0.1497      Uiso 1.00 calc . . .
 H13    H  0.8909      -0.3043     0.2724      0.1497      Uiso 1.00 calc . . .
 H14    H  1.0036      -0.4257     0.2648      0.1152      Uiso 1.00 calc . . .
 H15    H  1.0459      -0.3167     0.2803      0.1152      Uiso 1.00 calc . . .
 H16    H  0.9422      -0.4141     0.3125      0.0942      Uiso 1.00 calc . . .
 H17    H  0.9525      -0.5127     0.3011      0.0942      Uiso 1.00 calc . . .
 H18    H  0.9114      -0.5234     0.3632      0.1054      Uiso 1.00 calc . . .
 H19    H  0.7923      -0.5967     0.3747      0.1054      Uiso 1.00 calc . . .
 H20    H  0.9575      -0.6142     0.3912      0.1199      Uiso 1.00 calc . . .
 H21    H  0.8381      -0.7219     0.3904      0.1199      Uiso 1.00 calc . . .
 H22    H  1.0117      -0.6601     0.3573      0.1623      Uiso 1.00 calc . . .
 H23    H  0.9353      -0.7799     0.3682      0.1623      Uiso 1.00 calc . . .
 H24    H  0.7872      -0.8182     0.3425      0.1193      Uiso 1.00 calc . . .
 H25    H  0.8844      -0.7333     0.3258      0.1193      Uiso 1.00 calc . . .

loop_
_atom_site_aniso_label
_atom_site_aniso_U_11
_atom_site_aniso_U_22
_atom_site_aniso_U_33
_atom_site_aniso_U_12
_atom_site_aniso_U_13
_atom_site_aniso_U_23
 Fe1    0.0573(2)   0.0573      0.0260(2)   0.0287      0.0000      0.0000     
 Na1    0.0544(7)   0.0544      0.0359(8)   0.0272      0.0000      0.0000     
 O1     0.063(1)    0.066(1)    0.051(1)    0.029(1)    0.0040(9)   0.0112(9)  
 O2     0.066(1)    0.079(1)    0.048(1)    0.038(1)    -0.0105(9)  -0.0013(10)
 N1     0.073(2)    0.0733      0.025(2)    0.0367      0.0000      0.0000     
 N2     0.060(1)    0.057(1)    0.035(1)    0.030(1)    0.0046(10)  0.0035(10) 
 C1     0.086(2)    0.087(2)    0.030(1)    0.047(2)    0.009(1)    0.003(1)   
 C2     0.071(2)    0.072(2)    0.038(1)    0.040(2)    0.011(1)    0.009(1)   
 C3     0.078(2)    0.067(2)    0.056(2)    0.037(2)    0.023(2)    0.016(1)   
 C4     0.060(2)    0.055(2)    0.073(2)    0.026(2)    0.007(1)    0.006(1)   
 C5     0.055(2)    0.055(2)    0.053(1)    0.031(1)    -0.001(1)   0.003(1)   
 C6     0.050(2)    0.067(2)    0.050(1)    0.033(1)    -0.010(1)   -0.006(1)  
 C7     0.077(2)    0.081(2)    0.069(2)    0.048(2)    -0.018(2)   -0.014(2)  
 C8     0.094(3)    0.109(3)    0.075(3)    0.065(3)    -0.033(2)   -0.039(2)  
 C9     0.083(3)    0.158(4)    0.045(2)    0.072(3)    -0.019(2)   -0.034(2)  
 C10    0.074(2)    0.132(4)    0.045(2)    0.043(2)    -0.009(2)   -0.010(2)  
 C11    0.061(2)    0.091(2)    0.040(2)    0.030(2)    -0.011(1)   -0.010(2)  
 C12    0.084(3)    0.109(3)    0.074(2)    0.048(2)    0.011(2)    0.037(2)   
 C13    0.076(3)    0.118(4)    0.139(4)    0.045(3)    0.021(3)    0.071(3)   
 C14    0.076(2)    0.089(3)    0.107(3)    0.033(2)    0.014(2)    0.028(2)   
 C15    0.067(2)    0.085(2)    0.065(2)    0.029(2)    -0.001(2)   0.007(2)   
 C16    0.117(3)    0.083(3)    0.069(2)    0.054(3)    -0.035(2)   -0.010(2)  
 C17    0.122(3)    0.102(3)    0.072(2)    0.067(3)    -0.029(2)   -0.001(2)  
 C18    0.131(4)    0.197(6)    0.102(3)    0.127(5)    -0.039(3)   -0.033(3)  
 C19    0.092(3)    0.142(4)    0.081(2)    0.083(3)    -0.021(2)   -0.026(2)  

#------------------------------------------------------------------------------

_geom_special_details
;
 ?
;
loop_
_geom_bond_atom_site_label_1
_geom_bond_atom_site_label_2
_geom_bond_distance
_geom_bond_site_symmetry_1
_geom_bond_site_symmetry_2
_geom_bond_publ_flag
 FE1       N1        2.179(4)   . . yes
 FE1       N2        2.006(2)   . . yes
 FE1       N2        2.006(2)   . 2_645 yes
 FE1       N2        2.006(2)   . 3_765 yes
 NA1       O1        2.392(2)   . . yes
 NA1       O1        2.392(2)   . 2_535 yes
 NA1       O1        2.392(2)   . 3_755 yes
 NA1       O2        2.396(2)   . . yes
 NA1       O2        2.396(2)   . 2_535 yes
 NA1       O2        2.396(2)   . 3_755 yes
 O1        C12       1.440(4)   . . yes
 O1        C15       1.421(4)   . . yes
 O2        C16       1.428(4)   . . yes
 O2        C19       1.427(5)   . . yes
 O3        O3        0.66(1)    . 2_645 yes
 O3        O3        0.66(1)    . 3_765 yes
 O3        C20       1.39(1)    . . yes
 O3        C20       1.38(2)    . 2_645 yes
 O3        C22       1.05(2)    . . yes
 O3        C22       1.59(2)    . 2_645 yes
 O3        C22       1.46(2)    . 3_765 yes
 N1        C1        1.471(4)   . . yes
 N1        C1        1.471(4)   . 2_645 yes
 N1        C1        1.471(4)   . 3_765 yes
 N2        C2        1.391(3)   . . yes
 N2        C5        1.389(4)   . . yes
 C1        C2        1.509(5)   . . yes
 C2        C3        1.350(5)   . . yes
 C3        C4        1.418(5)   . . yes
 C4        C5        1.369(4)   . . yes
 C5        C6        1.446(4)   . . yes
 C6        C7        1.400(4)   . . yes
 C6        C11       1.401(4)   . . yes
 C7        C8        1.385(5)   . . yes
 C8        C9        1.349(6)   . . yes
 C9        C10       1.395(7)   . . yes
 C10       C11       1.402(4)   . . yes
 C12       C13       1.465(6)   . . yes
 C13       C14       1.485(6)   . . yes
 C14       C15       1.505(5)   . . yes
 C16       C17       1.476(6)   . . yes
 C17       C18       1.462(6)   . . yes
 C18       C19       1.505(6)   . . yes
 C20       C21       1.51(1)    . . yes
 C20       C22       1.48(2)    . . yes
 C20       C22       0.92(2)    . 3_765 yes
 C20       C23       1.82(2)    . . yes
 C20       C23       1.83(2)    . 3_765 yes
 C21       C21       1.53(2)    . 2_645 yes
 C21       C21       1.53(2)    . 3_765 yes
 C21       C22       1.73(2)    . 3_765 yes
 C21       C23       0.80(2)    . . yes
 C21       C23       1.57(1)    . 2_645 yes
 C21       C23       0.81(2)    . 3_765 yes
 C22       C23       1.62(2)    . . yes
 C23       C23       1.19(3)    . 2_645 yes
 C23       C23       1.19(3)    . 3_765 yes
 C1        H8        0.938      . . no
 C1        H9        0.978      . . no
 C3        H1        0.971      . . no
 C4        H2        0.961      . . no
 C7        H3        0.978      . . no
 C8        H4        0.990      . . no
 C9        H5        0.946      . . no
 C10       H6        0.989      . . no
 C11       H7        0.969      . . no
 C12       H10       0.915      . . no
 C12       H11       0.991      . . no
 C13       H12       0.965      . . no
 C13       H13       0.949      . . no
 C14       H14       1.000      . . no
 C14       H15       0.938      . . no
 C15       H16       0.981      . . no
 C15       H17       0.962      . . no
 C16       H18       0.931      . . no
 C16       H19       0.982      . . no
 C17       H20       0.950      . . no
 C17       H21       0.987      . . no
 C18       H22       0.926      . . no
 C18       H23       1.013      . . no
 C19       H24       0.983      . . no
 C19       H25       0.974      . . no

#------------------------------------------------------------------------------

loop_
_geom_angle_atom_site_label_1
_geom_angle_atom_site_label_2
_geom_angle_atom_site_label_3
_geom_angle
_geom_angle_site_symmetry_1
_geom_angle_site_symmetry_2
_geom_angle_site_symmetry_3
_geom_angle_publ_flag
 N1        FE1       N2        82.71(6)    .  .  .  ?
 N1        FE1       N2        82.71(6)    1_555  1_555   2_645   ?
 N1        FE1       N2        82.71(6)    1_555  1_555   3_765   ?
 N2        FE1       N2        118.42(3)   1_555  1_555   2_645   ?
 N2        FE1       N2        118.42(3)   1_555  1_555   3_765   ?
 N2        FE1       N2        118.42(3)   2_645   1_555  3_765   ?
 O1        NA1       O1        89.07(8)    1_555  1_555   2_535   ?
 O1        NA1       O1        89.07(8)    1_555  1_555   3_755   ?
 O1        NA1       O2        91.22(7)    .  .  .  ?
 O1        NA1       O2        90.84(7)    1_555  1_555   2_535   ?
 O1        NA1       O2        179.69(9)   1_555  1_555   3_755   ?
 O1        NA1       O1        89.07(8)    2_535   1_555  3_755   ?
 O1        NA1       O2        179.69(9)   2_535   1_555  1_555  ?
 O1        NA1       O2        91.22(7)    2_535   1_555  2_535   ?
 O1        NA1       O2        90.84(8)    2_535   1_555  3_755   ?
 O1        NA1       O2        90.84(7)    3_755   1_555  1_555  ?
 O1        NA1       O2        179.69(9)   3_755   1_555  2_535   ?
 O1        NA1       O2        91.22(7)    3_755   1_555  3_755   ?
 O2        NA1       O2        88.86(8)    1_555  1_555   2_535   ?
 O2        NA1       O2        88.86(8)    1_555  1_555   3_755   ?
 O2        NA1       O2        88.86(8)    2_535   1_555  3_755   ?
 NA1       O1        C12       125.0(2)    .  .  .  ?
 NA1       O1        C15       125.4(2)    .  .  .  ?
 C12       O1        C15       109.3(3)    .  .  .  ?
 NA1       O2        C16       127.0(2)    .  .  .  ?
 NA1       O2        C19       122.1(2)    .  .  .  ?
 C16       O2        C19       110.0(3)    .  .  .  ?
 O3        O3        O3        60.000(3)   2_645   1_555  3_765   ?
 O3        O3        C20       123(1)      2_645   1_555  1_555  ?
 O3        O3        C20       76(1)       2_645   1_555  2_645   ?
 O3        O3        C22       116(2)      2_645   1_555  1_555  ?
 O3        O3        C22       26.9(7)     2_645   1_555  2_645   ?
 O3        O3        C22       88(1)       2_645   1_555  3_765   ?
 O3        O3        C20       76(1)       3_765   1_555  1_555  ?
 O3        O3        C20       124(1)      3_765   1_555  2_645   ?
 O3        O3        C22       136(1)      3_765   1_555  1_555  ?
 O3        O3        C22       66(1)       3_765   1_555  2_645   ?
 O3        O3        C22       39(1)       3_765   1_555  3_765   ?
 C20       O3        C20       105.3(7)    1_555  1_555   2_645   ?
 C20       O3        C22       73(1)       .  .  .  ?
 C20       O3        C22       105.8(8)    1_555  1_555   2_645   ?
 C20       O3        C22       37.6(8)     1_555  1_555   3_765   ?
 C20       O3        C22       41(1)       2_645   1_555  1_555  ?
 C20       O3        C22       59.1(8)     2_645   1_555  2_645   ?
 C20       O3        C22       113.3(8)    2_645   1_555  3_765   ?
 C22       O3        C22       93(1)       1_555  1_555   2_645   ?
 C22       O3        C22       100(1)      1_555  1_555   3_765   ?
 C22       O3        C22       79.4(8)     2_645   1_555  3_765   ?
 FE1       N1        C1        105.0(2)    .  .  .  ?
 FE1       N1        C1        105.0(2)    1_555  1_555   2_645   ?
 FE1       N1        C1        105.0(2)    1_555  1_555   3_765   ?
 C1        N1        C1        113.6(1)    1_555  1_555   2_645   ?
 C1        N1        C1        113.6(1)    1_555  1_555   3_765   ?
 C1        N1        C1        113.6(1)    2_645   1_555  3_765   ?
 FE1       N2        C2        113.1(2)    .  .  .  ?
 FE1       N2        C5        139.0(2)    .  .  .  ?
 C2        N2        C5        105.5(2)    .  .  .  ?
 N1        C1        C2        110.2(2)    .  .  .  ?
 N2        C2        C1        116.9(3)    .  .  .  ?
 N2        C2        C3        110.9(3)    .  .  .  ?
 C1        C2        C3        132.2(3)    .  .  .  ?
 C2        C3        C4        106.6(3)    .  .  .  ?
 C3        C4        C5        107.3(3)    .  .  .  ?
 N2        C5        C4        109.6(3)    .  .  .  ?
 N2        C5        C6        121.1(2)    .  .  .  ?
 C4        C5        C6        129.2(3)    .  .  .  ?
 C5        C6        C7        120.5(3)    .  .  .  ?
 C5        C6        C11       122.1(3)    .  .  .  ?
 C7        C6        C11       117.5(3)    .  .  .  ?
 C6        C7        C8        121.5(4)    .  .  .  ?
 C7        C8        C9        120.5(4)    .  .  .  ?
 C8        C9        C10       120.5(3)    .  .  .  ?
 C9        C10       C11       119.4(4)    .  .  .  ?
 C6        C11       C10       120.6(3)    .  .  .  ?
 O1        C12       C13       106.8(3)    .  .  .  ?
 C12       C13       C14       105.9(3)    .  .  .  ?
 C13       C14       C15       103.2(3)    .  .  .  ?
 O1        C15       C14       107.1(3)    .  .  .  ?
 O2        C16       C17       105.2(3)    .  .  .  ?
 C16       C17       C18       102.8(4)    .  .  .  ?
 C17       C18       C19       103.8(4)    .  .  .  ?
 O2        C19       C18       104.1(3)    .  .  .  ?
 O3        C20       O3        27.4(5)     1_555  1_555   3_765   ?
 O3        C20       C21       111.0(8)    .  .  .  ?
 O3        C20       C22       42.7(7)     .  .  .  ?
 O3        C20       C22       75(1)       1_555  1_555   3_765   ?
 O3        C20       C23       89.3(9)     .  .  .  ?
 O3        C20       C23       97.9(8)     1_555  1_555   3_765   ?
 O3        C20       C21       110.9(8)    3_765   1_555  1_555  ?
 O3        C20       C22       67.3(9)     3_765   1_555  1_555  ?
 O3        C20       C22       49(1)       3_765   1_555  3_765   ?
 O3        C20       C23       98.3(9)     3_765   1_555  1_555  ?
 O3        C20       C23       89.0(9)     3_765   1_555  3_765   ?
 C21       C20       C22       83.6(10)    .  .  .  ?
 C21       C20       C22       87(1)       1_555  1_555   3_765   ?
 C21       C20       C23       25.8(5)     .  .  .  ?
 C21       C20       C23       25.7(5)     1_555  1_555   3_765   ?
 C22       C20       C22       106(1)      1_555  1_555   3_765   ?
 C22       C20       C23       57.8(10)    .  .  .  ?
 C22       C20       C23       86.9(10)    1_555  1_555   3_765   ?
 C22       C20       C23       95(1)       3_765   1_555  1_555  ?
 C22       C20       C23       62(1)       3_765   1_555  3_765   ?
 C23       C20       C23       38.2(9)     1_555  1_555   3_765   ?
 C20       C21       C21       102.6(6)    1_555  1_555   2_645   ?
 C20       C21       C21       103.1(6)    1_555  1_555   3_765   ?
 C20       C21       C22       32.1(7)     1_555  1_555   3_765   ?
 C20       C21       C23       99(1)       .  .  .  ?
 C20       C21       C23       104.9(9)    1_555  1_555   2_645   ?
 C20       C21       C23       100(1)      1_555  1_555   3_765   ?
 C21       C21       C21       60.000(5)   2_645   1_555  3_765   ?
 C21       C21       C22       100.9(7)    2_645   1_555  3_765   ?
 C21       C21       C23       17(1)       2_645   1_555  1_555  ?
 C21       C21       C23       30.0(6)     2_645   1_555  2_645   ?
 C21       C21       C23       77(1)       2_645   1_555  3_765   ?
 C21       C21       C22       74.9(10)    3_765   1_555  3_765   ?
 C21       C21       C23       77(1)       3_765   1_555  1_555  ?
 C21       C21       C23       30.0(6)     3_765   1_555  2_645   ?
 C21       C21       C23       17(1)       3_765   1_555  3_765   ?
 C22       C21       C23       107(1)      3_765   1_555  1_555  ?
 C22       C21       C23       87(1)       3_765   1_555  2_645   ?
 C22       C21       C23       68(1)       3_765   1_555  3_765   ?
 C23       C21       C23       47(1)       1_555  1_555   2_645   ?
 C23       C21       C23       95(2)       1_555  1_555   3_765   ?
 C23       C21       C23       47(1)       2_645   1_555  3_765   ?
 O3        C22       O3        23.7(8)     1_555  1_555   2_645   ?
 O3        C22       O3        16.5(5)     1_555  1_555   3_765   ?
 O3        C22       C20       64(1)       .  .  .  ?
 O3        C22       C20       89(1)       1_555  1_555   2_645   ?
 O3        C22       C21       115(1)      1_555  1_555   2_645   ?
 O3        C22       C23       115(1)      .  .  .  ?
 O3        C22       O3        24.4(4)     2_645   1_555  3_765   ?
 O3        C22       C20       77.3(10)    2_645   1_555  1_555  ?
 O3        C22       C20       66(1)       2_645   1_555  2_645   ?
 O3        C22       C21       96(1)       2_645   1_555  2_645   ?
 O3        C22       C23       104(1)      2_645   1_555  1_555  ?
 O3        C22       C20       53.5(8)     3_765   1_555  1_555  ?
 O3        C22       C20       89(1)       3_765   1_555  2_645   ?
 O3        C22       C21       102(1)      3_765   1_555  2_645   ?
 O3        C22       C23       98(1)       3_765   1_555  1_555  ?
 C20       C22       C20       132(1)      1_555  1_555   2_645   ?
 C20       C22       C21       95(1)       1_555  1_555   2_645   ?
 C20       C22       C23       71(1)       .  .  .  ?
 C20       C22       C21       60(1)       2_645   1_555  2_645   ?
 C20       C22       C23       87(1)       2_645   1_555  1_555  ?
 C21       C22       C23       27.6(7)     2_645   1_555  1_555  ?
 C20       C23       C20       74.2(8)     1_555  1_555   2_645   ?
 C20       C23       C21       54(1)       .  .  .  ?
 C20       C23       C21       124(1)      1_555  1_555   2_645   ?
 C20       C23       C21       88(1)       1_555  1_555   3_765   ?
 C20       C23       C22       50.4(9)     .  .  .  ?
 C20       C23       C23       106(1)      1_555  1_555   2_645   ?
 C20       C23       C23       71(1)       1_555  1_555   3_765   ?
 C20       C23       C21       124(1)      2_645   1_555  1_555  ?
 C20       C23       C21       54(1)       2_645   1_555  2_645   ?
 C20       C23       C21       87(1)       2_645   1_555  3_765   ?
 C20       C23       C22       30.1(8)     2_645   1_555  1_555  ?
 C20       C23       C23       70(1)       2_645   1_555  2_645   ?
 C20       C23       C23       105(1)      2_645   1_555  3_765   ?
 C21       C23       C21       144(2)      1_555  1_555   2_645   ?
 C21       C23       C21       72(1)       1_555  1_555   3_765   ?
 C21       C23       C22       105(1)      .  .  .  ?
 C21       C23       C23       102(1)      1_555  1_555   2_645   ?
 C21       C23       C23       42(1)       1_555  1_555   3_765   ?
 C21       C23       C21       72(1)       2_645   1_555  3_765   ?
 C21       C23       C22       83(1)       2_645   1_555  1_555  ?
 C21       C23       C23       42(1)       2_645   1_555  2_645   ?
 C21       C23       C23       102(1)      2_645   1_555  3_765   ?
 C21       C23       C22       103(1)      3_765   1_555  1_555  ?
 C21       C23       C23       30.0(8)     3_765   1_555  2_645   ?
 C21       C23       C23       30.0(8)     3_765   1_555  3_765   ?
 C22       C23       C23       96(1)       1_555  1_555   2_645   ?
 C22       C23       C23       107.8(8)    1_555  1_555   3_765   ?
 C23       C23       C23       60.000(2)   2_645   1_555  3_765   ?
 N1        C1        H8        109.963     .  .  .  no
 N1        C1        H9        107.811     .  .  .  no
 C2        C1        H8        112.041     .  .  .  no
 C2        C1        H9        108.592     .  .  .  no
 H8        C1        H9        108.072     .  .  .  no
 C2        C3        H1        126.559     .  .  .  no
 C4        C3        H1        126.734     .  .  .  no
 C3        C4        H2        126.615     .  .  .  no
 C5        C4        H2        126.046     .  .  .  no
 C6        C7        H3        119.862     .  .  .  no
 C8        C7        H3        118.657     .  .  .  no
 C7        C8        H4        118.232     .  .  .  no
 C9        C8        H4        121.268     .  .  .  no
 C8        C9        H5        121.030     .  .  .  no
 C10       C9        H5        118.349     .  .  .  no
 C9        C10       H6        121.623     .  .  .  no
 C11       C10       H6        118.944     .  .  .  no
 C6        C11       H7        120.428     .  .  .  no
 C10       C11       H7        118.985     .  .  .  no
 O1        C12       H10       113.740     .  .  .  no
 O1        C12       H11       109.604     .  .  .  no
 C13       C12       H10       111.282     .  .  .  no
 C13       C12       H11       106.279     .  .  .  no
 H10       C12       H11       108.856     .  .  .  no
 C12       C13       H12       108.857     .  .  .  no
 C12       C13       H13       112.404     .  .  .  no
 C14       C13       H12       111.659     .  .  .  no
 C14       C13       H13       109.829     .  .  .  no
 H12       C13       H13       108.231     .  .  .  no
 C13       C14       H14       110.483     .  .  .  no
 C13       C14       H15       114.174     .  .  .  no
 C15       C14       H14       108.635     .  .  .  no
 C15       C14       H15       113.995     .  .  .  no
 H14       C14       H15       106.332     .  .  .  no
 O1        C15       H16       110.298     .  .  .  no
 O1        C15       H17       110.910     .  .  .  no
 C14       C15       H16       109.120     .  .  .  no
 C14       C15       H17       113.453     .  .  .  no
 H16       C15       H17       105.939     .  .  .  no
 O2        C16       H18       111.498     .  .  .  no
 O2        C16       H19       107.727     .  .  .  no
 C17       C16       H18       112.840     .  .  .  no
 C17       C16       H19       111.077     .  .  .  no
 H18       C16       H19       108.341     .  .  .  no
 C16       C17       H20       113.227     .  .  .  no
 C16       C17       H21       112.695     .  .  .  no
 C18       C17       H20       111.225     .  .  .  no
 C18       C17       H21       110.556     .  .  .  no
 H20       C17       H21       106.464     .  .  .  no
 C17       C18       H22       112.359     .  .  .  no
 C17       C18       H23       109.462     .  .  .  no
 C19       C18       H22       114.841     .  .  .  no
 C19       C18       H23       110.169     .  .  .  no
 H22       C18       H23       106.161     .  .  .  no
 O2        C19       H24       109.787     .  .  .  no
 O2        C19       H25       110.676     .  .  .  no
 C18       C19       H24       114.783     .  .  .  no
 C18       C19       H25       112.722     .  .  .  no
 H24       C19       H25       104.825     .  .  .  no

#------------------------------------------------------------------------------

loop_
_geom_torsion_atom_site_label_1
_geom_torsion_atom_site_label_2
_geom_torsion_atom_site_label_3
_geom_torsion_atom_site_label_4
_geom_torsion
_geom_torsion_site_symmetry_1
_geom_torsion_site_symmetry_2
_geom_torsion_site_symmetry_3
_geom_torsion_site_symmetry_4
_geom_torsion_publ_flag
   FE1     N1      C1      C2      36.0(2)  1_555 1_555 1_555 1_555 yes
   FE1     N1      C1      C2      36.0(2)  1_555 1_555 2_645 2_645 yes
   FE1     N1      C1      C2      36.0(2)  1_555 1_555 3_765 3_765 yes
   FE1     N2      C2      C1      14.2(3)  1_555 1_555 1_555 1_555 yes
   FE1     N2      C2      C3      -166.2(2) 1_555 1_555 1_555 1_555 yes
   FE1     N2      C5      C4      160.4(2) 1_555 1_555 1_555 1_555 yes
   FE1     N2      C5      C6      -16.1(5) 1_555 1_555 1_555 1_555 yes
   FE1     N2      C2      C1      14.2(3)  1_555 2_645 2_645 2_645 yes
   FE1     N2      C2      C3      -166.2(2) 1_555 2_645 2_645 2_645 yes
   FE1     N2      C5      C4      160.4(2) 1_555 2_645 2_645 2_645 yes
   FE1     N2      C5      C6      -16.1(5) 1_555 2_645 2_645 2_645 yes
   FE1     N2      C2      C1      14.2(3)  1_555 3_765 3_765 3_765 yes
   FE1     N2      C2      C3      -166.2(2) 1_555 3_765 3_765 3_765 yes
   FE1     N2      C5      C4      160.4(2) 1_555 3_765 3_765 3_765 yes
   FE1     N2      C5      C6      -16.1(5) 1_555 3_765 3_765 3_765 yes
   NA1     O1      C12     C13     166.8(3) 1_555 1_555 1_555 1_555 yes
   NA1     O1      C15     C14     175.4(2) 1_555 1_555 1_555 1_555 yes
   NA1     O1      C12     C13     166.8(3) 1_555 2_535 2_535 2_535 yes
   NA1     O1      C15     C14     175.4(2) 1_555 2_535 2_535 2_535 yes
   NA1     O1      C12     C13     166.8(3) 1_555 3_755 3_755 3_755 yes
   NA1     O1      C15     C14     175.4(2) 1_555 3_755 3_755 3_755 yes
   NA1     O2      C16     C17     154.0(3) 1_555 1_555 1_555 1_555 yes
   NA1     O2      C19     C18     -177.9(3) 1_555 1_555 1_555 1_555 yes
   NA1     O2      C16     C17     154.0(3) 1_555 2_535 2_535 2_535 yes
   NA1     O2      C19     C18     -177.9(3) 1_555 2_535 2_535 2_535 yes
   NA1     O2      C16     C17     154.0(3) 1_555 3_755 3_755 3_755 yes
   NA1     O2      C19     C18     -177.9(3) 1_555 3_755 3_755 3_755 yes
   O1      NA1     O1      C12     90.0(3)  1_555 1_555 2_535 2_535 yes
   O1      NA1     O1      C15     -95.9(3) 1_555 1_555 2_535 2_535 yes
   O1      NA1     O1      C12     1.0(3)   1_555 1_555 3_755 3_755 yes
   O1      NA1     O1      C15     175.0(3) 1_555 1_555 3_755 3_755 yes
   O1      NA1     O2      C16     94.6(3)  1_555 1_555 1_555 1_555 yes
   O1      NA1     O2      C19     -97.1(3) 1_555 1_555 1_555 1_555 yes
   O1      NA1     O2      C16     -176.3(3) 1_555 1_555 2_535 2_535 yes
   O1      NA1     O2      C19     -8.0(3)  1_555 1_555 2_535 2_535 yes
   O1      NA1     O2      C16     -102(17) 1_555 1_555 3_755 3_755 yes
   O1      NA1     O2      C19     66(17)   1_555 1_555 3_755 3_755 yes
   O1      C12     C13     C14     22.7(5)  1_555 1_555 1_555 1_555 yes
   O1      C15     C14     C13     23.1(5)  1_555 1_555 1_555 1_555 yes
   O2      NA1     O1      C12     -179.1(3) 1_555 1_555 1_555 1_555 yes
   O2      NA1     O1      C15     -5.1(3)  1_555 1_555 1_555 1_555 yes
   O2      NA1     O1      C12     -73(17)  1_555 1_555 2_535 2_535 yes
   O2      NA1     O1      C15     100(17)  1_555 1_555 2_535 2_535 yes
   O2      NA1     O1      C12     -90.2(3) 1_555 1_555 3_755 3_755 yes
   O2      NA1     O1      C15     83.8(3)  1_555 1_555 3_755 3_755 yes
   O2      NA1     O2      C16     -85.1(3) 1_555 1_555 2_535 2_535 yes
   O2      NA1     O2      C19     83.2(3)  1_555 1_555 2_535 2_535 yes
   O2      NA1     O2      C16     3.8(3)   1_555 1_555 3_755 3_755 yes
   O2      NA1     O2      C19     172.1(3) 1_555 1_555 3_755 3_755 yes
   O2      C16     C17     C18     32.7(5)  1_555 1_555 1_555 1_555 yes
   O2      C19     C18     C17     28.2(6)  1_555 1_555 1_555 1_555 yes
   O3      O3      O3      C20     -44(1)   1_555 2_645 3_765 1_555 yes
   O3      O3      O3      C20     -143.5(4) 1_555 2_645 3_765 3_765 yes
   O3      O3      O3      C22     -29.2(7) 1_555 2_645 3_765 1_555 yes
   O3      O3      O3      C22     -130(1)  1_555 2_645 3_765 2_645 yes
   O3      O3      O3      C22     -97(3)   1_555 2_645 3_765 3_765 yes
   O3      O3      C20     C21     95(1)    1_555 2_645 2_645 2_645 yes
   O3      O3      C20     C22     13(1)    1_555 2_645 2_645 1_555 yes
   O3      O3      C20     C22     149(1)   1_555 2_645 2_645 2_645 yes
   O3      O3      C20     C23     72(1)    1_555 2_645 2_645 1_555 yes
   O3      O3      C20     C23     109(1)   1_555 2_645 2_645 2_645 yes
   O3      O3      C20     C21     -57(2)   1_555 2_645 3_765 3_765 yes
   O3      O3      C20     C22     -123(2)  1_555 2_645 3_765 2_645 yes
   O3      O3      C20     C22     16(1)    1_555 2_645 3_765 3_765 yes
   O3      O3      C20     C23     -70(2)   1_555 2_645 3_765 2_645 yes
   O3      O3      C20     C23     -33(2)   1_555 2_645 3_765 3_765 yes
   O3      O3      C22     C20     53(2)    1_555 2_645 1_555 1_555 yes
   O3      O3      C22     C20     -159(2)  1_555 2_645 1_555 2_645 yes
   O3      O3      C22     C21     146(2)   1_555 2_645 1_555 2_645 yes
   O3      O3      C22     C23     120(2)   1_555 2_645 1_555 1_555 yes
   O3      O3      C22     C20     -46(3)   1_555 2_645 2_645 2_645 yes
   O3      O3      C22     C20     92(4)    1_555 2_645 2_645 3_765 yes
   O3      O3      C22     C21     35(4)    1_555 2_645 2_645 3_765 yes
   O3      O3      C22     C23     5(4)     1_555 2_645 2_645 2_645 yes
   O3      O3      C22     C20     -18(1)   1_555 2_645 3_765 1_555 yes
   O3      O3      C22     C20     -165(1)  1_555 2_645 3_765 3_765 yes
   O3      O3      C22     C21     -78(1)   1_555 2_645 3_765 1_555 yes
   O3      O3      C22     C23     -106(1)  1_555 2_645 3_765 3_765 yes
   O3      O3      O3      C20     43(1)    1_555 3_765 2_645 2_645 yes
   O3      O3      O3      C20     143.5(4) 1_555 3_765 2_645 3_765 yes
   O3      O3      O3      C22     29.2(7)  1_555 3_765 2_645 1_555 yes
   O3      O3      O3      C22     130(1)   1_555 3_765 2_645 2_645 yes
   O3      O3      O3      C22     97(3)    1_555 3_765 2_645 3_765 yes
   O3      O3      C20     C21     -95(1)   1_555 3_765 1_555 1_555 yes
   O3      O3      C20     C22     -22(1)   1_555 3_765 1_555 1_555 yes
   O3      O3      C20     C22     -162(2)  1_555 3_765 1_555 3_765 yes
   O3      O3      C20     C23     -72(1)   1_555 3_765 1_555 1_555 yes
   O3      O3      C20     C23     -109(1)  1_555 3_765 1_555 3_765 yes
   O3      O3      C20     C21     56(2)    1_555 3_765 3_765 3_765 yes
   O3      O3      C20     C22     -24(2)   1_555 3_765 3_765 2_645 yes
   O3      O3      C20     C22     110(2)   1_555 3_765 3_765 3_765 yes
   O3      O3      C20     C23     34(2)    1_555 3_765 3_765 2_645 yes
   O3      O3      C20     C23     71(1)    1_555 3_765 3_765 3_765 yes
   O3      O3      C22     C20     125(4)   1_555 3_765 1_555 1_555 yes
   O3      O3      C22     C20     -87(4)   1_555 3_765 1_555 2_645 yes
   O3      O3      C22     C21     -147(4)  1_555 3_765 1_555 2_645 yes
   O3      O3      C22     C23     -175(4)  1_555 3_765 1_555 1_555 yes
   O3      O3      C22     C20     11(1)    1_555 3_765 2_645 2_645 yes
   O3      O3      C22     C20     159(1)   1_555 3_765 2_645 3_765 yes
   O3      O3      C22     C21     105(1)   1_555 3_765 2_645 3_765 yes
   O3      O3      C22     C23     78(1)    1_555 3_765 2_645 2_645 yes
   O3      O3      C22     C20     19(2)    1_555 3_765 3_765 1_555 yes
   O3      O3      C22     C20     -119(2)  1_555 3_765 3_765 3_765 yes
   O3      O3      C22     C21     -37(3)   1_555 3_765 3_765 1_555 yes
   O3      O3      C22     C23     -67(3)   1_555 3_765 3_765 3_765 yes
   O3      C20     O3      C20     121(1)   1_555 1_555 3_765 3_765 yes
   O3      C20     O3      C22     22(1)    1_555 1_555 3_765 1_555 yes
   O3      C20     O3      C22     82(1)    1_555 1_555 3_765 2_645 yes
   O3      C20     O3      C22     162(2)   1_555 1_555 3_765 3_765 yes
   O3      C20     C21     C21     17(1)    1_555 1_555 1_555 2_645 yes
   O3      C20     C21     C21     -44(1)   1_555 1_555 1_555 3_765 yes
   O3      C20     C21     C22     -73(1)   1_555 1_555 1_555 3_765 yes
   O3      C20     C21     C23     34(2)    1_555 1_555 1_555 1_555 yes
   O3      C20     C21     C23     -13(1)   1_555 1_555 1_555 2_645 yes
   O3      C20     C21     C23     -62(2)   1_555 1_555 1_555 3_765 yes
   O3      C20     C22     C20     -62(2)   1_555 1_555 1_555 2_645 yes
   O3      C20     C22     C21     -116(1)  1_555 1_555 1_555 2_645 yes
   O3      C20     C22     C23     -131(1)  1_555 1_555 1_555 1_555 yes
   O3      C20     C22     C20     44(2)    1_555 1_555 3_765 3_765 yes
   O3      C20     C22     C21     112.4(8) 1_555 1_555 3_765 1_555 yes
   O3      C20     C22     C23     107(1)   1_555 1_555 3_765 3_765 yes
   O3      C20     C23     C20     9.5(5)   1_555 1_555 1_555 2_645 yes
   O3      C20     C23     C21     -147(2)  1_555 1_555 1_555 1_555 yes
   O3      C20     C23     C21     -11(2)   1_555 1_555 1_555 2_645 yes
   O3      C20     C23     C21     -78(1)   1_555 1_555 1_555 3_765 yes
   O3      C20     C23     C22     30.6(9)  1_555 1_555 1_555 1_555 yes
   O3      C20     C23     C23     -54(2)   1_555 1_555 1_555 2_645 yes
   O3      C20     C23     C23     -103(1)  1_555 1_555 1_555 3_765 yes
   O3      C20     C23     C20     -35.5(6) 1_555 1_555 3_765 3_765 yes
   O3      C20     C23     C21     123(1)   1_555 1_555 3_765 1_555 yes
   O3      C20     C23     C21     53(1)    1_555 1_555 3_765 2_645 yes
   O3      C20     C23     C21     -12(2)   1_555 1_555 3_765 3_765 yes
   O3      C20     C23     C22     -69(1)   1_555 1_555 3_765 3_765 yes
   O3      C20     C23     C23     78(1)    1_555 1_555 3_765 1_555 yes
   O3      C20     C23     C23     29(2)    1_555 1_555 3_765 2_645 yes
   O3      C20     O3      C20     -122(1)  1_555 2_645 2_645 3_765 yes
   O3      C20     O3      C22     -13(1)   1_555 2_645 2_645 1_555 yes
   O3      C20     O3      C22     -149(1)  1_555 2_645 2_645 2_645 yes
   O3      C20     O3      C22     -60(1)   1_555 2_645 2_645 3_765 yes
   O3      C20     C21     C21     -15(1)   1_555 2_645 2_645 1_555 yes
   O3      C20     C21     C21     46(1)    1_555 2_645 2_645 3_765 yes
   O3      C20     C21     C22     -44(1)   1_555 2_645 2_645 1_555 yes
   O3      C20     C21     C23     -33(2)   1_555 2_645 2_645 1_555 yes
   O3      C20     C21     C23     64(2)    1_555 2_645 2_645 2_645 yes
   O3      C20     C21     C23     15(1)    1_555 2_645 2_645 3_765 yes
   O3      C20     C22     C20     52(1)    1_555 2_645 1_555 1_555 yes
   O3      C20     C22     C21     120(1)   1_555 2_645 1_555 2_645 yes
   O3      C20     C22     C23     115(1)   1_555 2_645 1_555 1_555 yes
   O3      C20     C22     C20     -47(2)   1_555 2_645 2_645 3_765 yes
   O3      C20     C22     C21     -101.6(10) 1_555 2_645 2_645 3_765 yes
   O3      C20     C22     C23     -116.5(10) 1_555 2_645 2_645 2_645 yes
   O3      C20     C23     C20     -9.5(5)  1_555 2_645 1_555 1_555 yes
   O3      C20     C23     C21     13(2)    1_555 2_645 1_555 1_555 yes
   O3      C20     C23     C21     149(1)   1_555 2_645 1_555 2_645 yes
   O3      C20     C23     C21     79(1)    1_555 2_645 1_555 3_765 yes
   O3      C20     C23     C22     -43(1)   1_555 2_645 1_555 1_555 yes
   O3      C20     C23     C23     104(1)   1_555 2_645 1_555 2_645 yes
   O3      C20     C23     C23     55(2)    1_555 2_645 1_555 3_765 yes
   O3      C20     C23     C20     35.4(6)  1_555 2_645 2_645 3_765 yes
   O3      C20     C23     C21     -52(1)   1_555 2_645 2_645 1_555 yes
   O3      C20     C23     C21     -121(2)  1_555 2_645 2_645 2_645 yes
   O3      C20     C23     C21     14(2)    1_555 2_645 2_645 3_765 yes
   O3      C20     C23     C22     56(1)    1_555 2_645 2_645 2_645 yes
   O3      C20     C23     C23     -77(1)   1_555 2_645 2_645 1_555 yes
   O3      C20     C23     C23     -28(2)   1_555 2_645 2_645 3_765 yes
   O3      C22     O3      C20     159(2)   1_555 1_555 2_645 2_645 yes
   O3      C22     O3      C20     -115(2)  1_555 1_555 2_645 3_765 yes
   O3      C22     O3      C22     -157(2)  1_555 1_555 2_645 2_645 yes
   O3      C22     O3      C22     -66(2)   1_555 1_555 2_645 3_765 yes
   O3      C22     O3      C20     -125(4)  1_555 1_555 3_765 1_555 yes
   O3      C22     O3      C20     135(4)   1_555 1_555 3_765 3_765 yes
   O3      C22     O3      C22     108(4)   1_555 1_555 3_765 2_645 yes
   O3      C22     O3      C22     -150(4)  1_555 1_555 3_765 3_765 yes
   O3      C22     C20     C21     130(1)   1_555 1_555 1_555 1_555 yes
   O3      C22     C20     C22     45(1)    1_555 1_555 1_555 3_765 yes
   O3      C22     C20     C23     131(1)   1_555 1_555 1_555 1_555 yes
   O3      C22     C20     C23     105(1)   1_555 1_555 1_555 3_765 yes
   O3      C22     C20     C21     -120(1)  1_555 1_555 2_645 2_645 yes
   O3      C22     C20     C22     -38(1)   1_555 1_555 2_645 2_645 yes
   O3      C22     C20     C23     -115(1)  1_555 1_555 2_645 1_555 yes
   O3      C22     C20     C23     -96(1)   1_555 1_555 2_645 2_645 yes
   O3      C22     C21     C20     73(2)    1_555 1_555 2_645 2_645 yes
   O3      C22     C21     C21     -77(2)   1_555 1_555 2_645 1_555 yes
   O3      C22     C21     C21     -23(2)   1_555 1_555 2_645 3_765 yes
   O3      C22     C21     C23     -95(2)   1_555 1_555 2_645 1_555 yes
   O3      C22     C21     C23     -6(3)    1_555 1_555 2_645 2_645 yes
   O3      C22     C21     C23     -50(2)   1_555 1_555 2_645 3_765 yes
   O3      C22     C23     C20     -48(1)   1_555 1_555 1_555 1_555 yes
   O3      C22     C23     C20     88(2)    1_555 1_555 1_555 2_645 yes
   O3      C22     C23     C21     -46(3)   1_555 1_555 1_555 1_555 yes
   O3      C22     C23     C21     97(2)    1_555 1_555 1_555 2_645 yes
   O3      C22     C23     C21     28(2)    1_555 1_555 1_555 3_765 yes
   O3      C22     C23     C23     57(3)    1_555 1_555 1_555 2_645 yes
   O3      C22     C23     C23     -2(3)    1_555 1_555 1_555 3_765 yes
   O3      C22     O3      C20     46(3)    1_555 2_645 2_645 2_645 yes
   O3      C22     O3      C20     -92(4)   1_555 2_645 2_645 3_765 yes
   O3      C22     O3      C22     20(3)    1_555 2_645 2_645 1_555 yes
   O3      C22     O3      C22     -58(3)   1_555 2_645 2_645 3_765 yes
   O3      C22     O3      C20     -74(1)   1_555 2_645 3_765 1_555 yes
   O3      C22     O3      C20     -159(1)  1_555 2_645 3_765 3_765 yes
   O3      C22     O3      C22     -25(1)   1_555 2_645 3_765 1_555 yes
   O3      C22     O3      C22     -116(1)  1_555 2_645 3_765 3_765 yes
   O3      C22     C20     C21     115.8(8) 1_555 2_645 2_645 2_645 yes
   O3      C22     C20     C22     30(1)    1_555 2_645 2_645 1_555 yes
   O3      C22     C20     C23     90.2(9)  1_555 2_645 2_645 1_555 yes
   O3      C22     C20     C23     116.5(10) 1_555 2_645 2_645 2_645 yes
   O3      C22     C20     C21     -104.2(8) 1_555 2_645 3_765 3_765 yes
   O3      C22     C20     C22     -21(1)   1_555 2_645 3_765 3_765 yes
   O3      C22     C20     C23     -98(1)   1_555 2_645 3_765 2_645 yes
   O3      C22     C20     C23     -79(1)   1_555 2_645 3_765 3_765 yes
   O3      C22     C21     C20     82(1)    1_555 2_645 3_765 3_765 yes
   O3      C22     C21     C21     -13(1)   1_555 2_645 3_765 1_555 yes
   O3      C22     C21     C21     -68(1)   1_555 2_645 3_765 2_645 yes
   O3      C22     C21     C23     -40(1)   1_555 2_645 3_765 1_555 yes
   O3      C22     C21     C23     -85(2)   1_555 2_645 3_765 2_645 yes
   O3      C22     C21     C23     3(2)     1_555 2_645 3_765 3_765 yes
   O3      C22     C23     C20     -46.7(8) 1_555 2_645 2_645 2_645 yes
   O3      C22     C23     C20     89(1)    1_555 2_645 2_645 3_765 yes
   O3      C22     C23     C21     29(2)    1_555 2_645 2_645 1_555 yes
   O3      C22     C23     C21     -45(2)   1_555 2_645 2_645 2_645 yes
   O3      C22     C23     C21     99(2)    1_555 2_645 2_645 3_765 yes
   O3      C22     C23     C23     -1(2)    1_555 2_645 2_645 1_555 yes
   O3      C22     C23     C23     59(2)    1_555 2_645 2_645 3_765 yes
   O3      C22     O3      C20     66(1)    1_555 3_765 2_645 2_645 yes
   O3      C22     O3      C20     165(1)   1_555 3_765 2_645 3_765 yes
   O3      C22     O3      C22     39(1)    1_555 3_765 2_645 1_555 yes
   O3      C22     O3      C22     140(1)   1_555 3_765 2_645 2_645 yes
   O3      C22     O3      C20     -19(2)   1_555 3_765 3_765 1_555 yes
   O3      C22     O3      C20     119(2)   1_555 3_765 3_765 3_765 yes
   O3      C22     O3      C22     14(1)    1_555 3_765 3_765 1_555 yes
   O3      C22     O3      C22     94(2)    1_555 3_765 3_765 2_645 yes
   O3      C22     C20     C21     -112.4(8) 1_555 3_765 1_555 1_555 yes
   O3      C22     C20     C22     -29(1)   1_555 3_765 1_555 1_555 yes
   O3      C22     C20     C23     -87.9(9) 1_555 3_765 1_555 1_555 yes
   O3      C22     C20     C23     -107(1)  1_555 3_765 1_555 3_765 yes
   O3      C22     C20     C21     109.7(8) 1_555 3_765 3_765 3_765 yes
   O3      C22     C20     C22     24(1)    1_555 3_765 3_765 2_645 yes
   O3      C22     C20     C23     84.1(9)  1_555 3_765 3_765 2_645 yes
   O3      C22     C20     C23     110(1)   1_555 3_765 3_765 3_765 yes
   O3      C22     C21     C20     58(1)    1_555 3_765 1_555 1_555 yes
   O3      C22     C21     C21     -37(1)   1_555 3_765 1_555 2_645 yes
   O3      C22     C21     C21     -92(1)   1_555 3_765 1_555 3_765 yes
   O3      C22     C21     C23     -20(2)   1_555 3_765 1_555 1_555 yes
   O3      C22     C21     C23     -64(1)   1_555 3_765 1_555 2_645 yes
   O3      C22     C21     C23     -109(2)  1_555 3_765 1_555 3_765 yes
   O3      C22     C23     C20     65(1)    1_555 3_765 3_765 1_555 yes
   O3      C22     C23     C20     -70(1)   1_555 3_765 3_765 3_765 yes
   O3      C22     C23     C21     75(2)    1_555 3_765 3_765 1_555 yes
   O3      C22     C23     C21     5(2)     1_555 3_765 3_765 2_645 yes
   O3      C22     C23     C21     -69(2)   1_555 3_765 3_765 3_765 yes
   O3      C22     C23     C23     34(2)    1_555 3_765 3_765 1_555 yes
   O3      C22     C23     C23     -25(3)   1_555 3_765 3_765 2_645 yes
   N1      FE1     N2      C2      5.7(2)   1_555 1_555 1_555 1_555 yes
   N1      FE1     N2      C5      -153.2(3) 1_555 1_555 1_555 1_555 yes
   N1      FE1     N2      C2      5.7(2)   1_555 1_555 2_645 2_645 yes
   N1      FE1     N2      C5      -153.2(3) 1_555 1_555 2_645 2_645 yes
   N1      FE1     N2      C2      5.7(2)   1_555 1_555 3_765 3_765 yes
   N1      FE1     N2      C5      -153.2(3) 1_555 1_555 3_765 3_765 yes
   N1      C1      C2      N2      -35.7(4) 1_555 1_555 1_555 1_555 yes
   N1      C1      C2      C3      144.9(4) 1_555 1_555 1_555 1_555 yes
   N1      C1      C2      N2      -35.7(4) 1_555 2_645 2_645 2_645 yes
   N1      C1      C2      C3      144.9(4) 1_555 2_645 2_645 2_645 yes
   N1      C1      C2      N2      -35.7(4) 1_555 3_765 3_765 3_765 yes
   N1      C1      C2      C3      144.9(4) 1_555 3_765 3_765 3_765 yes
   N2      FE1     N1      C1      -23.6(2) 1_555 1_555 1_555 1_555 yes
   N2      FE1     N1      C1      96.4(2)  1_555 1_555 1_555 2_645 yes
   N2      FE1     N1      C1      -143.6(2) 1_555 1_555 1_555 3_765 yes
   N2      FE1     N2      C2      -71.9(2) 1_555 1_555 2_645 2_645 yes
   N2      FE1     N2      C5      129.2(3) 1_555 1_555 2_645 2_645 yes
   N2      FE1     N2      C2      83.3(2)  1_555 1_555 3_765 3_765 yes
   N2      FE1     N2      C5      -75.6(3) 1_555 1_555 3_765 3_765 yes
   N2      C2      C3      C4      0.1(4)   1_555 1_555 1_555 1_555 yes
   N2      C5      C4      C3      -0.5(3)  1_555 1_555 1_555 1_555 yes
   N2      C5      C6      C7      150.4(3) 1_555 1_555 1_555 1_555 yes
   N2      C5      C6      C11     -28.8(4) 1_555 1_555 1_555 1_555 yes
   C1      N1      C1      C2      150.0(3) 1_555 1_555 2_645 2_645 yes
   C1      N1      C1      C2      -78.1(4) 1_555 1_555 3_765 3_765 yes
   C1      C2      N2      C5      -180.0(3) 1_555 1_555 1_555 1_555 yes
   C1      C2      C3      C4      179.6(3) 1_555 1_555 1_555 1_555 yes
   C2      N2      C5      C4      0.5(3)   1_555 1_555 1_555 1_555 yes
   C2      N2      C5      C6      -176.0(3) 1_555 1_555 1_555 1_555 yes
   C2      C3      C4      C5      0.2(4)   1_555 1_555 1_555 1_555 yes
   C3      C2      N2      C5      -0.4(4)  1_555 1_555 1_555 1_555 yes
   C3      C4      C5      C6      175.7(3) 1_555 1_555 1_555 1_555 yes
   C4      C5      C6      C7      -25.4(5) 1_555 1_555 1_555 1_555 yes
   C4      C5      C6      C11     155.4(3) 1_555 1_555 1_555 1_555 yes
   C5      C6      C7      C8      -178.0(3) 1_555 1_555 1_555 1_555 yes
   C5      C6      C11     C10     177.0(3) 1_555 1_555 1_555 1_555 yes
   C6      C7      C8      C9      0.1(6)   1_555 1_555 1_555 1_555 yes
   C6      C11     C10     C9      1.9(5)   1_555 1_555 1_555 1_555 yes
   C7      C6      C11     C10     -2.2(5)  1_555 1_555 1_555 1_555 yes
   C7      C8      C9      C10     -0.4(6)  1_555 1_555 1_555 1_555 yes
   C8      C7      C6      C11     1.1(5)   1_555 1_555 1_555 1_555 yes
   C8      C9      C10     C11     -0.6(6)  1_555 1_555 1_555 1_555 yes
   C12     O1      C15     C14     -9.7(4)  1_555 1_555 1_555 1_555 yes
   C12     C13     C14     C15     -27.7(5) 1_555 1_555 1_555 1_555 yes
   C13     C12     O1      C15     -8.0(5)  1_555 1_555 1_555 1_555 yes
   C16     O2      C19     C18     -7.8(5)  1_555 1_555 1_555 1_555 yes
   C16     C17     C18     C19     -37.2(6) 1_555 1_555 1_555 1_555 yes
   C17     C16     O2      C19     -15.4(5) 1_555 1_555 1_555 1_555 yes
   C20     O3      O3      C20     -99(1)   1_555 1_555 2_645 2_645 yes
   C20     O3      O3      C20     0(2)     1_555 1_555 2_645 3_765 yes
   C20     O3      O3      C22     -86(1)   1_555 1_555 2_645 1_555 yes
   C20     O3      O3      C22     -53(4)   1_555 1_555 2_645 2_645 yes
   C20     O3      O3      C22     14(1)    1_555 1_555 2_645 3_765 yes
   C20     O3      O3      C20     -99(1)   1_555 1_555 3_765 3_765 yes
   C20     O3      O3      C22     -45(3)   1_555 1_555 3_765 1_555 yes
   C20     O3      O3      C22     -114.3(8) 1_555 1_555 3_765 2_645 yes
   C20     O3      O3      C22     -12(1)   1_555 1_555 3_765 3_765 yes
   C20     O3      C20     O3      121(1)   1_555 1_555 2_645 2_645 yes
   C20     O3      C20     C21     26.2(9)  1_555 1_555 2_645 2_645 yes
   C20     O3      C20     C22     -40(1)   1_555 1_555 2_645 1_555 yes
   C20     O3      C20     C22     99.5(8)  1_555 1_555 2_645 2_645 yes
   C20     O3      C20     C23     12.5(7)  1_555 1_555 2_645 1_555 yes
   C20     O3      C20     C23     49.6(7)  1_555 1_555 2_645 2_645 yes
   C20     O3      C22     C21     82(1)    1_555 1_555 1_555 2_645 yes
   C20     O3      C22     C23     52(1)    1_555 1_555 1_555 1_555 yes
   C20     O3      C22     C21     -11(1)   1_555 1_555 2_645 3_765 yes
   C20     O3      C22     C23     -39(1)   1_555 1_555 2_645 2_645 yes
   C20     O3      C22     C21     -54(1)   1_555 1_555 3_765 1_555 yes
   C20     O3      C22     C23     -80(1)   1_555 1_555 3_765 3_765 yes
   C20     O3      O3      C20     99(1)    1_555 3_765 1_555 2_645 yes
   C20     O3      O3      C22     45(3)    1_555 3_765 1_555 1_555 yes
   C20     O3      O3      C22     114.3(8) 1_555 3_765 1_555 2_645 yes
   C20     O3      O3      C22     12(1)    1_555 3_765 1_555 3_765 yes
   C20     O3      O3      C20     0(2)     1_555 3_765 2_645 2_645 yes
   C20     O3      O3      C20     99(1)    1_555 3_765 2_645 3_765 yes
   C20     O3      O3      C22     -15(1)   1_555 3_765 2_645 1_555 yes
   C20     O3      O3      C22     86(3)    1_555 3_765 2_645 2_645 yes
   C20     O3      O3      C22     53(2)    1_555 3_765 2_645 3_765 yes
   C20     O3      C20     O3      -122(1)  1_555 3_765 3_765 2_645 yes
   C20     O3      C20     C21     -27.0(9) 1_555 3_765 3_765 3_765 yes
   C20     O3      C20     C22     -108(1)  1_555 3_765 3_765 2_645 yes
   C20     O3      C20     C22     26(1)    1_555 3_765 3_765 3_765 yes
   C20     O3      C20     C23     -49.9(7) 1_555 3_765 3_765 2_645 yes
   C20     O3      C20     C23     -12.5(7) 1_555 3_765 3_765 3_765 yes
   C20     O3      C22     C21     87(1)    1_555 3_765 1_555 2_645 yes
   C20     O3      C22     C23     59(1)    1_555 3_765 1_555 1_555 yes
   C20     O3      C22     C21     30(1)    1_555 3_765 2_645 3_765 yes
   C20     O3      C22     C23     4(1)     1_555 3_765 2_645 2_645 yes
   C20     O3      C22     C21     -56(1)   1_555 3_765 3_765 1_555 yes
   C20     O3      C22     C23     -86(2)   1_555 3_765 3_765 3_765 yes
   C20     C21     C21     C20     0(1)     1_555 1_555 2_645 2_645 yes
   C20     C21     C21     C21     -98.0(8) 1_555 1_555 2_645 3_765 yes
   C20     C21     C21     C22     14(1)    1_555 1_555 2_645 1_555 yes
   C20     C21     C21     C23     81(4)    1_555 1_555 2_645 1_555 yes
   C20     C21     C21     C23     -97(1)   1_555 1_555 2_645 2_645 yes
   C20     C21     C21     C23     -97(1)   1_555 1_555 2_645 3_765 yes
   C20     C21     C21     C20     0(1)     1_555 1_555 3_765 3_765 yes
   C20     C21     C21     C21     97.1(8)  1_555 1_555 3_765 2_645 yes
   C20     C21     C21     C22     31(1)    1_555 1_555 3_765 2_645 yes
   C20     C21     C21     C23     97(1)    1_555 1_555 3_765 1_555 yes
   C20     C21     C21     C23     97(1)    1_555 1_555 3_765 2_645 yes
   C20     C21     C21     C23     -82(4)   1_555 1_555 3_765 3_765 yes
   C20     C21     C22     C23     168(2)   1_555 1_555 3_765 3_765 yes
   C20     C21     C23     C21     -101(4)  1_555 1_555 1_555 2_645 yes
   C20     C21     C23     C21     -101.5(9) 1_555 1_555 1_555 3_765 yes
   C20     C21     C23     C22     -1(1)    1_555 1_555 1_555 1_555 yes
   C20     C21     C23     C23     -101.5(9) 1_555 1_555 1_555 2_645 yes
   C20     C21     C23     C23     -101(1)  1_555 1_555 1_555 3_765 yes
   C20     C21     C23     C21     89(1)    1_555 1_555 2_645 2_645 yes
   C20     C21     C23     C21     -90(1)   1_555 1_555 2_645 3_765 yes
   C20     C21     C23     C22     -12(2)   1_555 1_555 2_645 2_645 yes
   C20     C21     C23     C23     89(1)    1_555 1_555 2_645 1_555 yes
   C20     C21     C23     C23     -90(1)   1_555 1_555 2_645 3_765 yes
   C20     C21     C23     C21     100.8(9) 1_555 1_555 3_765 2_645 yes
   C20     C21     C23     C21     100(4)   1_555 1_555 3_765 3_765 yes
   C20     C21     C23     C22     -6(1)    1_555 1_555 3_765 3_765 yes
   C20     C21     C23     C23     100(1)   1_555 1_555 3_765 1_555 yes
   C20     C21     C23     C23     100.8(9) 1_555 1_555 3_765 2_645 yes
   C20     C22     O3      C22     -105.6(7) 1_555 1_555 1_555 2_645 yes
   C20     C22     O3      C22     -25.8(10) 1_555 1_555 1_555 3_765 yes
   C20     C22     O3      C22     -104(1)  1_555 1_555 2_645 2_645 yes
   C20     C22     O3      C22     -13(1)   1_555 1_555 2_645 3_765 yes
   C20     C22     O3      C22     -125.6(6) 1_555 1_555 3_765 2_645 yes
   C20     C22     O3      C22     -25(1)   1_555 1_555 3_765 3_765 yes
   C20     C22     C20     C21     -67(2)   1_555 1_555 2_645 2_645 yes
   C20     C22     C20     C22     14(3)    1_555 1_555 2_645 2_645 yes
   C20     C22     C20     C23     -62(2)   1_555 1_555 2_645 1_555 yes
   C20     C22     C20     C23     -43(2)   1_555 1_555 2_645 2_645 yes
   C20     C22     C21     C21     -14(1)   1_555 1_555 2_645 1_555 yes
   C20     C22     C21     C21     40(1)    1_555 1_555 2_645 3_765 yes
   C20     C22     C21     C23     -32(1)   1_555 1_555 2_645 1_555 yes
   C20     C22     C21     C23     57(2)    1_555 1_555 2_645 2_645 yes
   C20     C22     C21     C23     13(1)    1_555 1_555 2_645 3_765 yes
   C20     C22     C23     C21     1(2)     1_555 1_555 1_555 1_555 yes
   C20     C22     C23     C21     146(1)   1_555 1_555 1_555 2_645 yes
   C20     C22     C23     C21     76(1)    1_555 1_555 1_555 3_765 yes
   C20     C22     C23     C23     105(2)   1_555 1_555 1_555 2_645 yes
   C20     C22     C23     C23     45(2)    1_555 1_555 1_555 3_765 yes
   C20     C22     O3      C22     43(1)    1_555 3_765 1_555 1_555 yes
   C20     C22     O3      C22     134.4(9) 1_555 3_765 1_555 2_645 yes
   C20     C22     O3      C22     21(1)    1_555 3_765 2_645 1_555 yes
   C20     C22     O3      C22     121(1)   1_555 3_765 2_645 2_645 yes
   C20     C22     O3      C22     33(1)    1_555 3_765 3_765 1_555 yes
   C20     C22     O3      C22     113.1(10) 1_555 3_765 3_765 2_645 yes
   C20     C22     C20     C21     68(2)    1_555 3_765 3_765 3_765 yes
   C20     C22     C20     C22     -17(3)   1_555 3_765 3_765 2_645 yes
   C20     C22     C20     C23     42(2)    1_555 3_765 3_765 2_645 yes
   C20     C22     C20     C23     68(2)    1_555 3_765 3_765 3_765 yes
   C20     C22     C21     C21     -96(1)   1_555 3_765 1_555 2_645 yes
   C20     C22     C21     C21     -150(1)  1_555 3_765 1_555 3_765 yes
   C20     C22     C21     C23     -79(2)   1_555 3_765 1_555 1_555 yes
   C20     C22     C21     C23     -123(1)  1_555 3_765 1_555 2_645 yes
   C20     C22     C21     C23     -168(2)  1_555 3_765 1_555 3_765 yes
   C20     C22     C23     C21     9(2)     1_555 3_765 3_765 1_555 yes
   C20     C22     C23     C21     -59(2)   1_555 3_765 3_765 2_645 yes
   C20     C22     C23     C21     -134(2)  1_555 3_765 3_765 3_765 yes
   C20     C22     C23     C23     -30(2)   1_555 3_765 3_765 1_555 yes
   C20     C22     C23     C23     -90(2)   1_555 3_765 3_765 2_645 yes
   C20     C23     C20     C21     -158(2)  1_555 1_555 2_645 2_645 yes
   C20     C23     C20     C22     33(1)    1_555 1_555 2_645 1_555 yes
   C20     C23     C20     C22     -76.8(8) 1_555 1_555 2_645 2_645 yes
   C20     C23     C20     C23     -114(1)  1_555 1_555 2_645 2_645 yes
   C20     C23     C21     C21     101(4)   1_555 1_555 1_555 2_645 yes
   C20     C23     C21     C21     101.5(9) 1_555 1_555 1_555 3_765 yes
   C20     C23     C21     C22     32.0(8)  1_555 1_555 1_555 3_765 yes
   C20     C23     C21     C23     101.5(9) 1_555 1_555 1_555 2_645 yes
   C20     C23     C21     C23     101(1)   1_555 1_555 1_555 3_765 yes
   C20     C23     C21     C21     -75(4)   1_555 1_555 2_645 1_555 yes
   C20     C23     C21     C21     -75(1)   1_555 1_555 2_645 3_765 yes
   C20     C23     C21     C22     31(1)    1_555 1_555 2_645 1_555 yes
   C20     C23     C21     C23     -75(2)   1_555 1_555 2_645 2_645 yes
   C20     C23     C21     C23     -75(1)   1_555 1_555 2_645 3_765 yes
   C20     C23     C21     C21     -53(1)   1_555 1_555 3_765 1_555 yes
   C20     C23     C21     C21     126(1)   1_555 1_555 3_765 2_645 yes
   C20     C23     C21     C22     63(1)    1_555 1_555 3_765 2_645 yes
   C20     C23     C21     C23     126(1)   1_555 1_555 3_765 2_645 yes
   C20     C23     C21     C23     -53(1)   1_555 1_555 3_765 3_765 yes
   C20     C23     C22     C21     -146(1)  1_555 1_555 1_555 2_645 yes
   C20     C23     C23     C20     66(1)    1_555 1_555 2_645 2_645 yes
   C20     C23     C23     C20     0(2)     1_555 1_555 2_645 3_765 yes
   C20     C23     C23     C21     -56(1)   1_555 1_555 2_645 1_555 yes
   C20     C23     C23     C21     123(2)   1_555 1_555 2_645 2_645 yes
   C20     C23     C23     C21     -56(1)   1_555 1_555 2_645 3_765 yes
   C20     C23     C23     C22     30(2)    1_555 1_555 2_645 2_645 yes
   C20     C23     C23     C23     -56(1)   1_555 1_555 2_645 3_765 yes
   C20     C23     C23     C20     66(1)    1_555 1_555 3_765 3_765 yes
   C20     C23     C23     C21     -57(1)   1_555 1_555 3_765 1_555 yes
   C20     C23     C23     C21     122(1)   1_555 1_555 3_765 2_645 yes
   C20     C23     C23     C21     122(1)   1_555 1_555 3_765 3_765 yes
   C20     C23     C23     C22     15(1)    1_555 1_555 3_765 3_765 yes
   C20     C23     C23     C23     122.5(4) 1_555 1_555 3_765 2_645 yes
   C20     C23     C20     C21     157(2)   1_555 3_765 3_765 3_765 yes
   C20     C23     C20     C22     84(1)    1_555 3_765 3_765 2_645 yes
   C20     C23     C20     C22     -21.1(10) 1_555 3_765 3_765 3_765 yes
   C20     C23     C20     C23     113(1)   1_555 3_765 3_765 2_645 yes
   C20     C23     C21     C21     -100.8(9) 1_555 3_765 1_555 2_645 yes
   C20     C23     C21     C21     -100(4)  1_555 3_765 1_555 3_765 yes
   C20     C23     C21     C22     6(1)     1_555 3_765 1_555 3_765 yes
   C20     C23     C21     C23     -100(1)  1_555 3_765 1_555 1_555 yes
   C20     C23     C21     C23     -100.8(9) 1_555 3_765 1_555 2_645 yes
   C20     C23     C21     C21     52(1)    1_555 3_765 2_645 1_555 yes
   C20     C23     C21     C21     -127(1)  1_555 3_765 2_645 3_765 yes
   C20     C23     C21     C22     -10(1)   1_555 3_765 2_645 1_555 yes
   C20     C23     C21     C23     52(1)    1_555 3_765 2_645 1_555 yes
   C20     C23     C21     C23     -127(1)  1_555 3_765 2_645 2_645 yes
   C20     C23     C21     C21     74(4)    1_555 3_765 3_765 1_555 yes
   C20     C23     C21     C21     74(1)    1_555 3_765 3_765 2_645 yes
   C20     C23     C21     C22     4(2)     1_555 3_765 3_765 2_645 yes
   C20     C23     C21     C23     74(1)    1_555 3_765 3_765 1_555 yes
   C20     C23     C21     C23     74(2)    1_555 3_765 3_765 2_645 yes
   C20     C23     C22     C21     -9(2)    1_555 3_765 3_765 1_555 yes
   C20     C23     C23     C20     -66(1)   1_555 3_765 1_555 2_645 yes
   C20     C23     C23     C21     57(1)    1_555 3_765 1_555 1_555 yes
   C20     C23     C23     C21     -122(1)  1_555 3_765 1_555 2_645 yes
   C20     C23     C23     C21     -122(1)  1_555 3_765 1_555 3_765 yes
   C20     C23     C23     C22     -35(1)   1_555 3_765 1_555 1_555 yes
   C20     C23     C23     C23     -122.5(4) 1_555 3_765 1_555 2_645 yes
   C20     C23     C23     C20     0(2)     1_555 3_765 2_645 2_645 yes
   C20     C23     C23     C20     -66(1)   1_555 3_765 2_645 3_765 yes
   C20     C23     C23     C21     55(1)    1_555 3_765 2_645 1_555 yes
   C20     C23     C23     C21     55(1)    1_555 3_765 2_645 2_645 yes
   C20     C23     C23     C21     -124(2)  1_555 3_765 2_645 3_765 yes
   C20     C23     C23     C22     -51(2)   1_555 3_765 2_645 2_645 yes
   C20     C23     C23     C23     55(1)    1_555 3_765 2_645 1_555 yes
   C21     C20     O3      C22     -53(1)   1_555 1_555 1_555 1_555 yes
   C21     C20     O3      C22     34(1)    1_555 1_555 1_555 2_645 yes
   C21     C20     O3      C22     81(1)    1_555 1_555 1_555 3_765 yes
   C21     C20     O3      C22     -73(1)   1_555 1_555 3_765 1_555 yes
   C21     C20     O3      C22     -12(1)   1_555 1_555 3_765 2_645 yes
   C21     C20     O3      C22     66(1)    1_555 1_555 3_765 3_765 yes
   C21     C20     C22     C23     0(1)     1_555 1_555 1_555 1_555 yes
   C21     C20     C22     C23     -5(1)    1_555 1_555 3_765 3_765 yes
   C21     C20     C23     C22     178(2)   1_555 1_555 1_555 1_555 yes
   C21     C20     C23     C23     93(1)    1_555 1_555 1_555 2_645 yes
   C21     C20     C23     C23     43(1)    1_555 1_555 1_555 3_765 yes
   C21     C20     C23     C22     167(2)   1_555 1_555 3_765 3_765 yes
   C21     C20     C23     C23     -44(1)   1_555 1_555 3_765 1_555 yes
   C21     C20     C23     C23     -93(1)   1_555 1_555 3_765 2_645 yes
   C21     C21     C20     C22     28(1)    1_555 2_645 2_645 1_555 yes
   C21     C21     C20     C22     -78(1)   1_555 2_645 2_645 2_645 yes
   C21     C21     C20     C23     17(1)    1_555 2_645 2_645 1_555 yes
   C21     C21     C20     C23     -79(1)   1_555 2_645 2_645 2_645 yes
   C21     C21     C21     C22     112.5(6) 1_555 2_645 3_765 2_645 yes
   C21     C21     C21     C23     0(1)     1_555 2_645 3_765 1_555 yes
   C21     C21     C21     C23     179(4)   1_555 2_645 3_765 2_645 yes
   C21     C21     C21     C23     0(1)     1_555 2_645 3_765 3_765 yes
   C21     C21     C22     C23     17(1)    1_555 2_645 1_555 1_555 yes
   C21     C21     C23     C22     -107(4)  1_555 2_645 1_555 1_555 yes
   C21     C21     C23     C23     0(5)     1_555 2_645 1_555 2_645 yes
   C21     C21     C23     C23     0(4)     1_555 2_645 1_555 3_765 yes
   C21     C21     C23     C22     100(1)   1_555 2_645 2_645 2_645 yes
   C21     C21     C23     C23     0(1)     1_555 2_645 2_645 1_555 yes
   C21     C21     C23     C23     0.000(2) 1_555 2_645 2_645 3_765 yes
   C21     C21     C23     C22     78(1)    1_555 2_645 3_765 3_765 yes
   C21     C21     C23     C23     0(2)     1_555 2_645 3_765 1_555 yes
   C21     C21     C23     C23     180.000(4) 1_555 2_645 3_765 2_645 yes
   C21     C21     C20     C22     90(1)    1_555 3_765 3_765 2_645 yes
   C21     C21     C20     C22     -16(1)   1_555 3_765 3_765 3_765 yes
   C21     C21     C20     C23     79(1)    1_555 3_765 3_765 2_645 yes
   C21     C21     C20     C23     -17(1)   1_555 3_765 3_765 3_765 yes
   C21     C21     C21     C22     -65.3(9) 1_555 3_765 2_645 1_555 yes
   C21     C21     C21     C23     0(1)     1_555 3_765 2_645 1_555 yes
   C21     C21     C21     C23     -179(4)  1_555 3_765 2_645 2_645 yes
   C21     C21     C21     C23     0(1)     1_555 3_765 2_645 3_765 yes
   C21     C21     C22     C23     72(1)    1_555 3_765 2_645 2_645 yes
   C21     C21     C23     C22     -101(2)  1_555 3_765 1_555 1_555 yes
   C21     C21     C23     C23     180.000(4) 1_555 3_765 1_555 2_645 yes
   C21     C21     C23     C23     0(2)     1_555 3_765 1_555 3_765 yes
   C21     C21     C23     C22     -106.9(8) 1_555 3_765 2_645 2_645 yes
   C21     C21     C23     C23     0.000(2) 1_555 3_765 2_645 1_555 yes
   C21     C21     C23     C23     0(1)     1_555 3_765 2_645 3_765 yes
   C21     C21     C23     C22     100(4)   1_555 3_765 3_765 3_765 yes
   C21     C21     C23     C23     0(4)     1_555 3_765 3_765 1_555 yes
   C21     C21     C23     C23     0(5)     1_555 3_765 3_765 2_645 yes
   C21     C22     O3      C22     -10(1)   1_555 3_765 1_555 1_555 yes
   C21     C22     O3      C22     80.4(5)  1_555 3_765 1_555 2_645 yes
   C21     C22     O3      C22     -38.4(9) 1_555 3_765 2_645 1_555 yes
   C21     C22     O3      C22     62.0(10) 1_555 3_765 2_645 2_645 yes
   C21     C22     O3      C22     -22(1)   1_555 3_765 3_765 1_555 yes
   C21     C22     O3      C22     56(1)    1_555 3_765 3_765 2_645 yes
   C21     C22     C20     C22     82(1)    1_555 3_765 1_555 1_555 yes
   C21     C22     C20     C23     24.6(7)  1_555 3_765 1_555 1_555 yes
   C21     C22     C20     C23     5(1)     1_555 3_765 1_555 3_765 yes
   C21     C22     C20     C22     -71(1)   1_555 3_765 3_765 2_645 yes
   C21     C22     C20     C23     -11(1)   1_555 3_765 3_765 2_645 yes
   C21     C22     C20     C23     15.0(7)  1_555 3_765 3_765 3_765 yes
   C21     C22     C23     C23     -40(1)   1_555 3_765 3_765 1_555 yes
   C21     C22     C23     C23     -100(2)  1_555 3_765 3_765 2_645 yes
   C21     C23     C20     C22     -178(2)  1_555 1_555 1_555 1_555 yes
   C21     C23     C20     C22     -72(2)   1_555 1_555 1_555 3_765 yes
   C21     C23     C20     C23     -43(1)   1_555 1_555 1_555 3_765 yes
   C21     C23     C20     C22     56(2)    1_555 1_555 2_645 1_555 yes
   C21     C23     C20     C22     -54(2)   1_555 1_555 2_645 2_645 yes
   C21     C23     C20     C23     -91(1)   1_555 1_555 2_645 2_645 yes
   C21     C23     C21     C22     107(4)   1_555 1_555 2_645 1_555 yes
   C21     C23     C21     C23     0(5)     1_555 1_555 2_645 2_645 yes
   C21     C23     C21     C23     0(4)     1_555 1_555 2_645 3_765 yes
   C21     C23     C21     C22     116(1)   1_555 1_555 3_765 2_645 yes
   C21     C23     C21     C23     -180.000(4) 1_555 1_555 3_765 2_645 yes
   C21     C23     C21     C23     0(2)     1_555 1_555 3_765 3_765 yes
   C21     C23     C23     C21     -179(3)  1_555 1_555 2_645 2_645 yes
   C21     C23     C23     C21     0.000(3) 1_555 1_555 2_645 3_765 yes
   C21     C23     C23     C22     87(2)    1_555 1_555 2_645 2_645 yes
   C21     C23     C23     C23     0(1)     1_555 1_555 2_645 3_765 yes
   C21     C23     C23     C21     -179(3)  1_555 1_555 3_765 2_645 yes
   C21     C23     C23     C21     -179(3)  1_555 1_555 3_765 3_765 yes
   C21     C23     C23     C22     73(2)    1_555 1_555 3_765 3_765 yes
   C21     C23     C23     C23     -179(2)  1_555 1_555 3_765 2_645 yes
   C21     C23     C20     C22     -3(1)    1_555 2_645 2_645 1_555 yes
   C21     C23     C20     C22     -109(1)  1_555 2_645 2_645 2_645 yes
   C21     C23     C20     C23     24.9(8)  1_555 2_645 2_645 1_555 yes
   C21     C23     C20     C22     122(1)   1_555 2_645 3_765 2_645 yes
   C21     C23     C20     C22     12(1)    1_555 2_645 3_765 3_765 yes
   C21     C23     C20     C23     -25.0(9) 1_555 2_645 3_765 3_765 yes
   C21     C23     C21     C22     -69(1)   1_555 2_645 2_645 1_555 yes
   C21     C23     C21     C23     0(1)     1_555 2_645 2_645 1_555 yes
   C21     C23     C21     C23     0.000(2) 1_555 2_645 2_645 3_765 yes
   C21     C23     C21     C22     106.9(8) 1_555 2_645 3_765 2_645 yes
   C21     C23     C21     C23     0.000(2) 1_555 2_645 3_765 1_555 yes
   C21     C23     C21     C23     0(1)     1_555 2_645 3_765 3_765 yes
   C21     C23     C23     C21     179(3)   1_555 2_645 1_555 2_645 yes
   C21     C23     C23     C21     -0.000(3) 1_555 2_645 1_555 3_765 yes
   C21     C23     C23     C22     -106(1)  1_555 2_645 1_555 1_555 yes
   C21     C23     C23     C23     0(1)     1_555 2_645 1_555 3_765 yes
   C21     C23     C23     C21     -0.000(3) 1_555 2_645 3_765 2_645 yes
   C21     C23     C23     C21     -179(3)  1_555 2_645 3_765 3_765 yes
   C21     C23     C23     C22     87(2)    1_555 2_645 3_765 3_765 yes
   C21     C23     C23     C23     0(1)     1_555 2_645 3_765 1_555 yes
   C21     C23     C20     C22     81(2)    1_555 3_765 1_555 1_555 yes
   C21     C23     C20     C22     -167(2)  1_555 3_765 1_555 3_765 yes
   C21     C23     C20     C23     44(1)    1_555 3_765 1_555 1_555 yes
   C21     C23     C20     C22     63(2)    1_555 3_765 3_765 2_645 yes
   C21     C23     C20     C22     -42(2)   1_555 3_765 3_765 3_765 yes
   C21     C23     C20     C23     92(1)    1_555 3_765 3_765 2_645 yes
   C21     C23     C21     C22     -63(1)   1_555 3_765 2_645 1_555 yes
   C21     C23     C21     C23     0(2)     1_555 3_765 2_645 1_555 yes
   C21     C23     C21     C23     -180.000(4) 1_555 3_765 2_645 2_645 yes
   C21     C23     C21     C22     -69(4)   1_555 3_765 3_765 2_645 yes
   C21     C23     C21     C23     0(4)     1_555 3_765 3_765 1_555 yes
   C21     C23     C21     C23     0(5)     1_555 3_765 3_765 2_645 yes
   C21     C23     C23     C21     179(3)   1_555 3_765 1_555 2_645 yes
   C21     C23     C23     C21     179(3)   1_555 3_765 1_555 3_765 yes
   C21     C23     C23     C22     -92(2)   1_555 3_765 1_555 1_555 yes
   C21     C23     C23     C23     179(2)   1_555 3_765 1_555 2_645 yes
   C21     C23     C23     C21     0.000(3) 1_555 3_765 2_645 2_645 yes
   C21     C23     C23     C21     179(3)   1_555 3_765 2_645 3_765 yes
   C21     C23     C23     C22     -106(1)  1_555 3_765 2_645 2_645 yes
   C21     C23     C23     C23     0(1)     1_555 3_765 2_645 1_555 yes
   C22     O3      O3      C22     32(5)    1_555 1_555 2_645 2_645 yes
   C22     O3      O3      C22     101(2)   1_555 1_555 2_645 3_765 yes
   C22     O3      O3      C22     -68(3)   1_555 1_555 3_765 2_645 yes
   C22     O3      O3      C22     32(5)    1_555 1_555 3_765 3_765 yes
   C22     O3      C20     C23     -39(1)   1_555 1_555 1_555 1_555 yes
   C22     O3      C20     C23     -76(1)   1_555 1_555 1_555 3_765 yes
   C22     O3      C20     C23     53(1)    1_555 1_555 2_645 1_555 yes
   C22     O3      C20     C23     90(1)    1_555 1_555 2_645 2_645 yes
   C22     O3      C22     O3      -150(4)  1_555 1_555 2_645 2_645 yes
   C22     O3      C22     O3      140(1)   1_555 1_555 2_645 3_765 yes
   C22     O3      C22     C23     34(1)    1_555 1_555 2_645 2_645 yes
   C22     O3      C22     O3      -116(1)  1_555 1_555 3_765 2_645 yes
   C22     O3      C22     O3      -157(2)  1_555 1_555 3_765 3_765 yes
   C22     O3      C22     C23     -37(1)   1_555 1_555 3_765 3_765 yes
   C22     O3      O3      C22     -32(5)   1_555 2_645 1_555 2_645 yes
   C22     O3      O3      C22     -101(2)  1_555 2_645 1_555 3_765 yes
   C22     O3      O3      C22     -101(2)  1_555 2_645 3_765 2_645 yes
   C22     O3      O3      C22     -68(3)   1_555 2_645 3_765 3_765 yes
   C22     O3      C20     C23     58(1)    1_555 2_645 2_645 1_555 yes
   C22     O3      C20     C23     95(1)    1_555 2_645 2_645 2_645 yes
   C22     O3      C20     C23     -26(1)   1_555 2_645 3_765 2_645 yes
   C22     O3      C20     C23     10(1)    1_555 2_645 3_765 3_765 yes
   C22     O3      C22     O3      20(3)    1_555 2_645 2_645 1_555 yes
   C22     O3      C22     O3      94(2)    1_555 2_645 2_645 3_765 yes
   C22     O3      C22     C23     26(1)    1_555 2_645 2_645 2_645 yes
   C22     O3      C22     O3      39(1)    1_555 2_645 3_765 1_555 yes
   C22     O3      C22     O3      108(4)   1_555 2_645 3_765 3_765 yes
   C22     O3      C22     C23     -66(1)   1_555 2_645 3_765 3_765 yes
   C22     O3      O3      C22     68(3)    1_555 3_765 1_555 2_645 yes
   C22     O3      O3      C22     -32(5)   1_555 3_765 1_555 3_765 yes
   C22     O3      O3      C22     101(2)   1_555 3_765 2_645 2_645 yes
   C22     O3      O3      C22     68(3)    1_555 3_765 2_645 3_765 yes
   C22     O3      C20     C23     -49.9(10) 1_555 3_765 1_555 1_555 yes
   C22     O3      C20     C23     -87.1(10) 1_555 3_765 1_555 3_765 yes
   C22     O3      C20     C23     11(1)    1_555 3_765 3_765 2_645 yes
   C22     O3      C20     C23     49.1(9)  1_555 3_765 3_765 3_765 yes
   C22     O3      C22     O3      -25(1)   1_555 3_765 2_645 1_555 yes
   C22     O3      C22     O3      -66(2)   1_555 3_765 2_645 2_645 yes
   C22     O3      C22     C23     53(1)    1_555 3_765 2_645 2_645 yes
   C22     O3      C22     O3      14(1)    1_555 3_765 3_765 1_555 yes
   C22     O3      C22     O3      -58(3)   1_555 3_765 3_765 2_645 yes
   C22     O3      C22     C23     -53(1)   1_555 3_765 3_765 3_765 yes
   C22     C20     C21     C23     1(2)     1_555 1_555 1_555 1_555 yes
   C22     C20     C21     C23     -47(1)   1_555 1_555 1_555 2_645 yes
   C22     C20     C21     C23     -96(2)   1_555 1_555 1_555 3_765 yes
   C22     C20     C22     C20     14(3)    1_555 1_555 3_765 3_765 yes
   C22     C20     C22     C23     77(1)    1_555 1_555 3_765 3_765 yes
   C22     C20     C23     C23     -84(2)   1_555 1_555 1_555 2_645 yes
   C22     C20     C23     C23     -134(2)  1_555 1_555 1_555 3_765 yes
   C22     C20     C23     C23     37(1)    1_555 1_555 3_765 1_555 yes
   C22     C20     C23     C23     -11(2)   1_555 1_555 3_765 2_645 yes
   C22     C20     C21     C23     10(2)    1_555 2_645 2_645 1_555 yes
   C22     C20     C21     C23     108(2)   1_555 2_645 2_645 2_645 yes
   C22     C20     C21     C23     59(2)    1_555 2_645 2_645 3_765 yes
   C22     C20     C22     C20     -17(3)   1_555 2_645 2_645 3_765 yes
   C22     C20     C22     C23     -86(1)   1_555 2_645 2_645 2_645 yes
   C22     C20     C23     C23     147(2)   1_555 2_645 1_555 2_645 yes
   C22     C20     C23     C23     98(2)    1_555 2_645 1_555 3_765 yes
   C22     C20     C23     C23     -28(2)   1_555 2_645 2_645 1_555 yes
   C22     C20     C23     C23     21(2)    1_555 2_645 2_645 3_765 yes
   C22     C21     C20     C23     -10(2)   1_555 2_645 2_645 1_555 yes
   C22     C21     C20     C23     -108(2)  1_555 2_645 2_645 2_645 yes
   C22     C21     C21     C22     47(1)    1_555 2_645 1_555 3_765 yes
   C22     C21     C21     C23     -67(4)   1_555 2_645 1_555 1_555 yes
   C22     C21     C21     C23     112(1)   1_555 2_645 1_555 2_645 yes
   C22     C21     C21     C23     112(1)   1_555 2_645 1_555 3_765 yes
   C22     C21     C21     C22     47(1)    1_555 2_645 3_765 2_645 yes
   C22     C21     C21     C23     -65(1)   1_555 2_645 3_765 1_555 yes
   C22     C21     C21     C23     114(4)   1_555 2_645 3_765 2_645 yes
   C22     C21     C21     C23     -65(1)   1_555 2_645 3_765 3_765 yes
   C22     C21     C23     C23     106(1)   1_555 2_645 1_555 2_645 yes
   C22     C21     C23     C23     106.9(8) 1_555 2_645 1_555 3_765 yes
   C22     C21     C23     C23     -69(1)   1_555 2_645 2_645 1_555 yes
   C22     C21     C23     C23     -69(1)   1_555 2_645 2_645 3_765 yes
   C22     C21     C23     C23     -63(1)   1_555 2_645 3_765 1_555 yes
   C22     C21     C23     C23     116(1)   1_555 2_645 3_765 2_645 yes
   C22     C23     C20     C23     134(2)   1_555 1_555 1_555 3_765 yes
   C22     C23     C20     C23     -147(2)  1_555 1_555 2_645 2_645 yes
   C22     C23     C21     C23     100(1)   1_555 1_555 1_555 2_645 yes
   C22     C23     C21     C23     100(1)   1_555 1_555 1_555 3_765 yes
   C22     C23     C21     C23     -106(1)  1_555 1_555 2_645 2_645 yes
   C22     C23     C21     C23     -106.9(8) 1_555 1_555 2_645 3_765 yes
   C22     C23     C21     C23     78(2)    1_555 1_555 3_765 2_645 yes
   C22     C23     C21     C23     -101(1)  1_555 1_555 3_765 3_765 yes
   C22     C23     C23     C22     -19(2)   1_555 1_555 2_645 2_645 yes
   C22     C23     C23     C23     -106(1)  1_555 1_555 2_645 3_765 yes
   C22     C23     C23     C22     -19(2)   1_555 1_555 3_765 3_765 yes
   C22     C23     C23     C23     87(1)    1_555 1_555 3_765 2_645 yes
   C23     C20     C23     C20     -114(1)  1_555 1_555 3_765 3_765 yes
   C23     C20     C23     C20     113(1)   1_555 2_645 2_645 3_765 yes
   C23     C21     C21     C23     -179(6)  1_555 1_555 2_645 2_645 yes
   C23     C21     C21     C23     -179(6)  1_555 1_555 2_645 3_765 yes
   C23     C21     C21     C23     0.000(3) 1_555 1_555 3_765 2_645 yes
   C23     C21     C21     C23     -179(6)  1_555 1_555 3_765 3_765 yes
   C23     C21     C23     C21     0(2)     1_555 1_555 2_645 2_645 yes
   C23     C21     C23     C21     -180.000(4) 1_555 1_555 2_645 3_765 yes
   C23     C21     C23     C21     0(1)     1_555 1_555 3_765 2_645 yes
   C23     C21     C23     C21     0(5)     1_555 1_555 3_765 3_765 yes
   C23     C21     C21     C23     179(6)   1_555 2_645 1_555 2_645 yes
   C23     C21     C21     C23     179(6)   1_555 2_645 1_555 3_765 yes
   C23     C21     C21     C23     179(6)   1_555 2_645 3_765 2_645 yes
   C23     C21     C21     C23     0.000(3) 1_555 2_645 3_765 3_765 yes
   C23     C21     C23     C21     0(1)     1_555 2_645 2_645 1_555 yes
   C23     C21     C23     C21     0(5)     1_555 2_645 2_645 3_765 yes
   C23     C21     C23     C21     0(2)     1_555 2_645 3_765 1_555 yes
   C23     C21     C23     C21     -180.000(4) 1_555 2_645 3_765 3_765 yes
   C23     C21     C21     C23     -0.000(3) 1_555 3_765 1_555 2_645 yes
   C23     C21     C21     C23     179(6)   1_555 3_765 1_555 3_765 yes
   C23     C21     C21     C23     -179(6)  1_555 3_765 2_645 2_645 yes
   C23     C21     C21     C23     -0.000(3) 1_555 3_765 2_645 3_765 yes
   C23     C21     C23     C21     0.000(2) 1_555 3_765 2_645 1_555 yes
   C23     C21     C23     C21     0(4)     1_555 3_765 2_645 2_645 yes
   C23     C21     C23     C21     0(4)     1_555 3_765 3_765 1_555 yes
   C23     C21     C23     C21     0.000(2) 1_555 3_765 3_765 2_645 yes

#------------------------------------------------------------------------------

loop_
_geom_contact_atom_site_label_1
_geom_contact_atom_site_label_2
_geom_contact_distance
_geom_contact_site_symmetry_1
_geom_contact_site_symmetry_2
_geom_contact_publ_flag
 NA1       C19       3.378(4)   . . ?
 NA1       C19       3.378(4)   . 2_535 ?
 NA1       C19       3.378(4)   . 3_755 ?
 NA1       C15       3.418(4)   . . ?
 NA1       C15       3.418(4)   . 2_535 ?
 NA1       C15       3.418(4)   . 3_755 ?
 NA1       C12       3.427(4)   . . ?
 NA1       C12       3.427(4)   . 2_535 ?
 NA1       C12       3.427(4)   . 3_755 ?
 NA1       C16       3.450(4)   . . ?
 NA1       C16       3.450(4)   . 2_535 ?
 NA1       C16       3.450(4)   . 3_755 ?
 O1        O1        3.356(4)   . 2_535 ?
 O1        O1        3.356(4)   . 3_755 ?
 O1        C12       3.403(4)   . 3_755 ?
 O1        C19       3.409(4)   . 2_535 ?
 O1        O2        3.411(3)   . 2_535 ?
 O1        O2        3.422(3)   . . ?
 O2        O2        3.355(4)   . 2_535 ?
 O2        O2        3.355(4)   . 3_755 ?
 O2        C16       3.447(5)   . 3_755 ?
 O2        C15       3.497(4)   . . ?
 O3        C10       3.372(9)   . 3_765 ?
 O3        C10       3.457(10)  . . ?
 C3        C22       3.38(2)    . 18_644 ?
 C4        C22       3.32(2)    . 18_644 ?
 C4        C23       3.51(2)    . 18_644 ?
 C5        C13       3.566(5)   . . ?
 C14       C20       3.39(1)    . 16_654 ?

#------------------------------------------------------------------------------
